# Supplementary material for: Multimodal epigenetic changes and altered NEUROD1 chromatin binding in the mouse hippocampus underlie FOXG1 syndrome
Source: PubMed Central journal article supplement (PMC9926245; doi:10.1073/pnas.2122467120), 2023-01-04
Supplement: pnas.2122467120.sapp.pdf [file pnas.2122467120.sapp.pdf]

## Supporting Information for

### Multimodal epigenetic changes and altered NEUROD1 chromatin binding in the mouse hippocampus underlie FOXG1 syndrome

Ipek Akol<sup>a,b</sup>, Annalisa Izzo<sup>a</sup>, Fabian Gather<sup>a</sup>, Stefanie Strack<sup>a</sup>, Stefanie Heidrich<sup>a</sup>, Darren Ó hAilín<sup>a,c</sup>, Alejandro Villarreal<sup>a,d</sup>, Christine Hacker<sup>a</sup>, Tudor Rauleac<sup>a</sup>, Chiara Bella<sup>e</sup>, Andre Fischer<sup>f,g,h</sup>, Thomas Manke<sup>e</sup>, and Tanja Vogel<sup>a,i,1</sup>

Corresponding author: Tanja Vogel  
Email: [tanja.vogel@anat.uni-freiburg.de](mailto:tanja.vogel@anat.uni-freiburg.de)

#### **This PDF file includes:**

Supplementary text for Material and Methods  
Figures and legends S1 to S13  
SI References

## SI Appendix – Material and Methods

### Mouse hippocampus isolation and primary neuronal culture

Hippocampi of E18.5 C57Bl/6 embryos (Charles River) were dissected and collected in 10 ml Hanks' Balanced Salt Solution (HBSS, Fisher Scientific) and dissociated in 0.25% Trypsin/EDTA (Fisher Scientific) solution at 37°C for 10 min. Dissociation was stopped by adding 10% fetal bovine serum (FBS, Fisher Scientific). Cells were collected by centrifugation and cultured in Neurobasal (NB)-complete medium, which consists of neurobasal medium (Fisher Scientific) supplemented with B27 (Fisher Scientific), L-glutamine (0.5 mM, Fisher Scientific), penicillin-streptomycin-neomycin (1X PSN, Fisher Scientific), apo-transferrin (5 µg/ml, Sigma), superoxide-dismutase (0.8 µg/ml, Sigma) and glutathione (1 µg/ml, Sigma). Cells were seeded on poly-L-ornithine (0.1 mg/ml, Sigma) and laminin (1 µg/ml, Sigma) coated 24-well plates (Corning).

### Viral transduction and selection of primary neurons

Lentiviral particles were prepared using plko.1-CMV.Puro-tGFP-shNeurod1 (Genscript), plko.1-CMV.Puro-tGFP-shFoxg1 (Genscript), or plko.1-CMV.Puro-tGFP-shluciferase (Sigma MISSION) plasmids, according to the protocol described previously (1, 2). Cells were transduced with lentiviral particles on day-in-vitro (DIV) 1. At DIV4, transduced cells were selected using 0.3 µg/ml puromycin (P9620, Sigma) and cell proliferation was inhibited by addition of 2 µM Arabinocytosine (AraC, C1768, Sigma), while performing a half-volume medium change. Medium was changed again at DIV7 and DIV9 including 0.3 µg/ml puromycin and 2 µM AraC. Cells were used for either protein or RNA isolation.

shRNA sequences:

|                           |                                                            |
|---------------------------|------------------------------------------------------------|
| shNeurod1                 | CCGGGCTCAGCATCAATGGCAACTTCTCGAGAAGTTGCCATTGATGCTGAGCTTTTTG |
| shFoxg1                   | CCGGCCTGACGCTCAATGGCATCTACTCGAGTAGATGCCATTGAGCGTCAGGTTTTTG |
| shluciferase<br>(Control) | CCGGCGCTGAGTACTTCGAAATGTCCTCGAGGACATTTTCAAGTACTCAGCGTTTTT  |

### Trichostatin A (TSA) treatment of primary hippocampal neurons

3.31 mM stock TSA solution (Sigma, #T8552) was prepared in DMSO (Sigma, #02438). Primary hippocampal neurons transduced with shFoxg1 or shluciferase were treated with 0.5 µM TSA or DMSO on DIV10. TSA and DMSO dilution to the final concentration was done using neurobasal medium.

### Systemic TSA injection of Foxg1<sup>+/+</sup>/Foxg1<sup>cre/+</sup> mice

0.006 mg/ml TSA solution (Sigma, #T8552) was prepared in 10% DMSO (Sigma, #02438) and 90% (5% β-Cyclodextrin, Sigma) in 0.9% NaCl (Braun). 5 week old Foxg1<sup>+/+</sup> and Foxg1<sup>cre/+</sup> mice were administered (intraperitoneal injection) with 0.6 mg/kg/day TSA daily for 7 days. Mice were sacrificed at 6 weeks and the hippocampal tissue was collected and snap frozen and kept at -80 °C until further processing.

### RNA isolation from tissue and primary hippocampal neurons

Hippocampi were frozen in liquid nitrogen immediately after dissection, and stored at -80°C until RNA extraction. Total RNA was isolated using RNeasy RNA isolation kit (Qiagen)

according to the instructions of the manufacturer. An on-column DNase digestion was routinely performed. Isolated RNA was kept at -80°C until following qRTPCR experiments.

Cells were harvested at DIV11 in buffer RLT (RNeasy RNA isolation kit, Qiagen) for total RNA extraction according to manufacturer's instructions. Total RNA was kept at -80°C until subsequent reverse transcription.

### *Reverse transcription and qRTPCR*

1 µg of total RNA was reverse transcribed using RevertAid MMuLV reverse transcriptase kit (Fermentas, Thermo Scientific). qRTPCR analysis was performed on a CFX-Connect Real-Time PCR detection system (Bio-Rad) using GoTaq qPCR Master Mix (Promega). Primers used had an efficiency level between 85% and 110%. qRTPCR results were analyzed using the  $\Delta\Delta C_t$  method with GAPDH as internal standard. GraphPad Prism software was used for plotting the bar graphs and for statistical analyses. Values in bar graphs are expressed as average  $\pm$  SEM.

The primers for the qRTPCR target regions are listed in the following table:

| <b>Target</b> | <b>Forward primer</b> | <b>Reverse primer</b> |
|---------------|-----------------------|-----------------------|
| Foxg1         | AATGACTTCGCAGACCAGCA  | CCGGACAGTCCTGTCTGTA   |
| Skap2         | CCGCTATTGCGAGTCTAGGT  | TCCTTTCAGTGTGTCTGCCA  |
| Dr1           | AGGCCAGTTCTCGTTTGGAA  | TGGGCCAATTCTGCTTGTG   |
| Bves          | ACGTTTGCTTTGCAGTTGGT  | TGGCCCAGACCACATAAAGG  |
| Lims1         | GCGGCCGGAATGACCA      | CACTGAGCACATACGAAGCAC |
| Tacr3         | CCGTACCCTTTGCTATGTGC  | GGTGTAGGTGACACCCATGA  |
| Tacr1         | CTGCTGGTGATTGGCTATGC  | CGAAGGTACACACAACCACG  |
| Gapdh         | CGGCCGCATCTTCTTGTG    | TGACCAGGCGCCCAATAC    |

### *ChIP-qPCR*

ChIP-qPCR was performed with hippocampal tissue of E18.5 and adult mice hippocampi (6 weeks old) either wildtype (WT) or Foxg1<sup>cre/+</sup> snap frozen at -80°C. For one ChIP, around 10 µg of chromatin was used. Tissue was thawed on ice, resuspended in 1 ml of PBS with proteinase inhibitors (Thermo Scientific) and dounced with 11 strokes using a small glass douncer homogenizer. Cell suspension was centrifuged at 2000 g for 5 min at 4°C and cell pellets were fixed with 1.5 ml of 1.5 mM EGS (ethylene glycol bis(succinimidyl succinate), Thermo Scientific, #21565) in PBS for 30 min followed by 1 % formaldehyde in PBS for 15 min. After stopping the reaction with glycine (125mM) and washing with PBS, the cell pellets were resuspended in ChIP Buffer (Active Motif #53040) and sonicated using a Bioruptor (Diagenode) with 60 cycles at 30 sec ON/OFF. Chromatin was cleared of debris by centrifugation at maximum speed at 4°C for 5 min. Chromatin immunoprecipitation was performed as described in the protocol of the ChIP-IT High Sensitivity kit (Active Motif, #53040). Antibodies used for the immunoprecipitation were rabbit anti-FOXG1 (Active Motif, #61211), anti-NeuroD1 (Abcam, #109224), and rabbit anti-H3K27ac (Active Motif, #39133) and anti-IgG (Diagenode, C15410206). The eluted DNA fragments were analysed by qPCR as described above. H3K27ac ChIP was performed as described above but cells were fixed for 5 min in 1 % formaldehyde. The primers for the target regions are listed in the following table:

| Target                  | Forward primer            | Reverse primer            |
|-------------------------|---------------------------|---------------------------|
| Gria1                   | GGTTAGGGTGTGACAAATGGG     | TCCTGTTCTGTGGGCTCA<br>TTC |
| Gria2                   | GGCACAATTCACACAGGGAC      | AAGGGTTAACAGGAGAC<br>GAGG |
| Bdnf                    | TCTGATGCAATTCCAAGCGTG     | AATCTCCCAGTTCTGCGT<br>TCA |
| Syt1                    | CACTTCCTGGACAGCTTAGCA     | TTTGAGCCCTGTGACTGT<br>CAG |
| cluster1_prkarb_intron  | CTTGGGAAGAGTGTGCTT<br>GTG | TAAACAGACCCAGCCAG<br>CAC  |
| cluster2_intergenic     | TCCATTTCTTCTCACTGGGC      | ATCACCGCGCAATTGTTA<br>ACC |
| cluster2_Rbms3_intron   | GGCAGGCAGAATTTTCAGACAC    | AGCCATGCCCAAAGTGA<br>GAT  |
| cluster 3_intergenic    | AGAAACCGCTTGCAGTACTGA     | CACAACGGATGCTAAGTA<br>GGC |
| K27ac_up_prox1_upstream | CACAACCTCGTTCTGCTTTGGA    | AATATCAGACTTAGCGGC<br>CCC |
| H3K27ac_down_intergenic | TGGAATCAAACCTCTCTCCAGC    | TGGCCCTTGTTCCAATAT<br>CCA |

### *Co-Immunoprecipitation (Co-IP)*

Tissue was lysed in lysis buffer (300 mM NaCl, 20 mM Tris, 1 mM EDTA, 0.5% Nonidet-40 (NP-40), pH 7.4) supplemented with protease inhibitor (Sigma-Aldrich) and incubated for 30 min on ice, triturating every 10 min 20 times. After a 10 min centrifugation at 13000 rpm, the supernatant was collected. The salt and NP-40 concentrations were brought down to 100 mM and 0.15%, respectively, using equilibration buffer (20 mM Tris, 1mM EDTA, pH 7.4). Protein concentrations were determined with Bradford reagent (Bio-Rad). 10% input was saved and equal amounts of protein were used for all Co-IPs. Protein G Dynabeads (10004D, Thermo Scientific) were washed once with Co-IP buffer (100 mM NaCl, 20 mM Tris, 1 mM EDTA, 0.15% NP-40 pH 7.4), and incubated with Co-IP antibodies at 4°C overnight. The following antibodies were used: anti-HDAC2 (#57156, Cell Signaling), anti-NEUROD1 (#Ab109224,

Abcam), anti-SIRT1 (#8469, Cell Signalling), anti-HDAC1 (#sc-81598, Santa Cruz), IgG (#C15410206 or #C15400001, Diagenode). Antibody-coupled beads were washed once with co-IP buffer before co-IP. Cell lysates were blocked with Protein G Dynabeads for 1 h at 4°C for preclearing, subsequently transferred to antibody-coupled beads, and incubated overnight at 4°C in rotation. Antibody-coupled beads were washed 3 times with Co-IP buffer before they were resuspended in 1X Laemmli sample buffer. Protein-antibody complexes were eluted by incubating the beads at 70°C for 10 min at 550 rpm. 10% input and the complete Co-IP sample were used for immunoblotting.

### *Immunoblotting*

Co-IP or protein samples were loaded on 8% or 10% SDS-polyacrylamide gels and run at 120 V for 1.5 h in Tris-Glycine running buffer. Proteins were transferred to PVDF membranes (Trans-blot Turbo Transfer Pack, Bio-Rad) using the Trans-blot Turbo Transfer System (Bio-Rad) following the manufacturer's instructions. Membranes were blocked with 5% BSA in TBS (Tris buffered saline) for 1 h. The following antibodies were used immunoblots: anti-FOXG1 (detecting monomers and dimers; anti-FOXG1, #61211, Active Motif), anti-HA-tag (#3724, Cell Signaling), anti-GAPDH (#ab8245, Abcam) or anti-H3 (#Ab1791-100, Abcam) diluted in 5% BSA in TBST (Tris buffered saline with 0.1% Tween-20). Membranes were washed 3 times with TBST and incubated with secondary antibody anti-rabbit HRP (1:10000 dilution in 5% BSA in TBST) or Tidyblot (Biorad, 1:5000 dilution) for 1 h. Membranes were washed twice with TBST and once with TBS before being developed using SuperSignal™ West Femto Maximum Sensitivity Substrate (Thermo Scientific). Membranes were imaged using LAS ImageQuant System (GE Healthcare). Protein levels were normalized and quantified using ImageStudio Lite (v5.2) software.

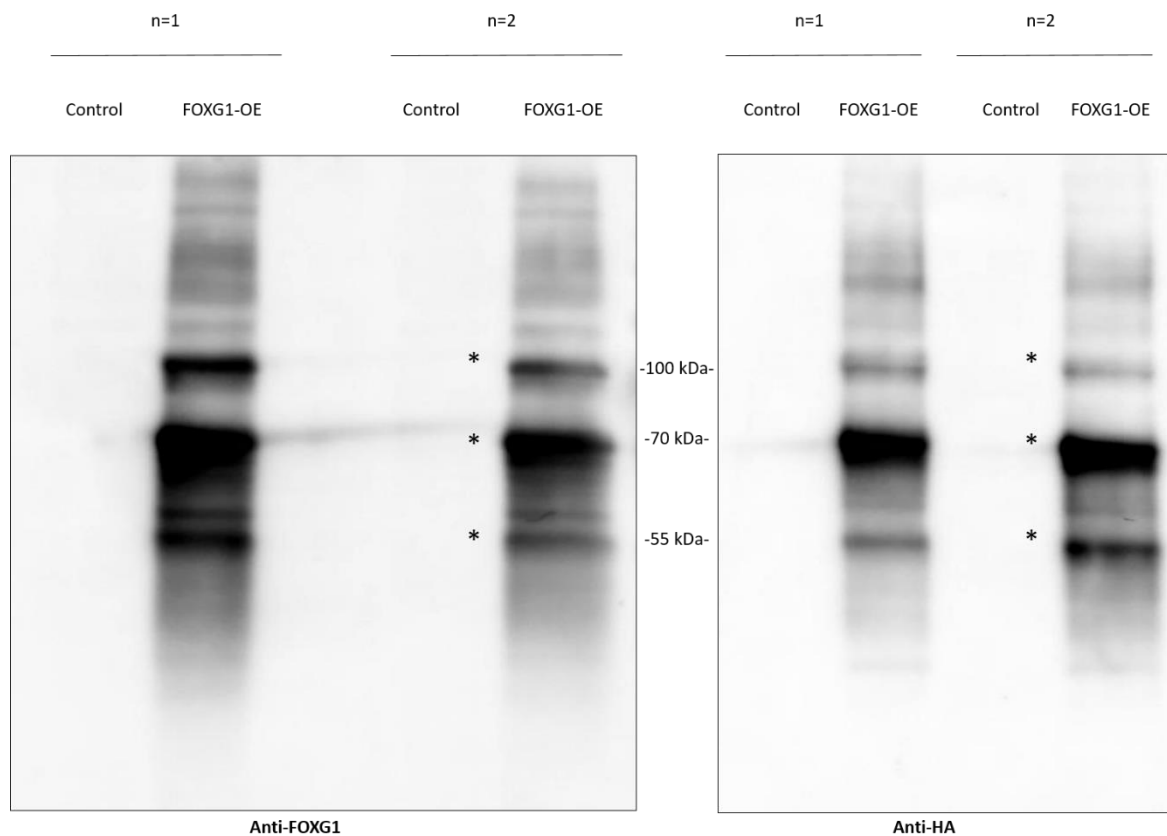

Figure i: Immunoblots confirming FOXG1 antibody specificity in samples from FOXG1 overexpression in N2A cells (n=2). Left: anti-FOXG1 (#61211, Active Motif); Right: anti-HA (#3724, Cell Signaling). FOXG1 bands are at 110, 70 and 55 kDa.

### Tissue sections, *in situ* hybridization and immunostaining

PFA fixed brains were embedded in TissueTec (SAKURA) cut in 14  $\mu$ m sections and mounted on SuperFrost Plus Microscope slides (Thermo Scientific). Probes for *in situ* hybridization were made by cloning PCR products into pGemTeasy (Promega). 1  $\mu$ g of the linearized plasmid was transcribed *in vitro* using NTP labelling mix and T7 or SP6 RNA Polymerase, followed by purification with mini Quick spin RNA columns (Roche). Probes were diluted in hybridization buffer in 1:500 or 1:1000 ratio and incubated on the sections overnight at 68°C. After washing and blocking in lamb serum in MABT buffer (5X MAB, 0.1% Tween 20), sections were incubated with Anti-DIG-AP (Roche) at 4°C overnight. After washing, sections were developed with NBT/BCIP (Roche) overnight and mounted. Bright field images were obtained using an Axioplan M2 microscope (Zeiss). Immunofluorescence was performed as described previously (3, 4) using antibodies against SATB2 (Abcam, ab92446), CTIP2 (Abcam, ab18465) and ZBTB20 (Sigma, HPA016815). Images were obtained using a primary magnification of 20x, and stitched together to ensemble the complete hippocampus using an Axioplan M2 fluorescent microscope (Zeiss) equipped with an Apotome.2 module.

### Dil tracing

Brains from 7 week old mice were dissected and immersion-fixed in 4% paraformaldehyde in 0.1 M phosphate buffer for 2-3 days and horizontal tissue sections of 2-3 mm thickness were cut by a razor blade. Small crystals of Dil (1,1'-dioctadecyl-3,3',3'-tetramethylindocarbocyanine perchlorate) mounted on the tip of a glass micropipette were placed into different regions of the hippocampal formation under visual control. The brain sections

were then stored for 5-6 weeks in the fixative solution at RT and in the dark to allow the labelling of fiber pathways. Next, sections were washed in PB and sliced into 100 µm thick vibratome sections and mounted on glass slides for fluorescence microscopy. Digital images were made using either Axioplan M2 (Zeiss) or ApoTome 1 (Zeiss).

### *N2A cell culture*

Mouse neuroblastoma cell line, Neuro-2a (N2A) was cultured in Dulbecco's modified Eagle's medium (DMEM, Thermo Scientific) supplemented with 10% fetal bovine serum (FBS, Thermo Scientific), 1% non-essential amino acids (NEAA, Thermo Scientific), 1% L-glutamine, and 1% penicillin, streptomycin, and neomycin (PSN, Thermo Scientific). Cells were maintained at 37°C, 95% relative humidity and 5% CO<sub>2</sub>.

### *FOXG1 overexpression in N2A cells*

N2A cells were maintained and transfected as described above. 25.000 cells/well were seeded in 6 well plates. 24 hours after seeding, cells were transfected with a total amount of 2.5 µg plentIII-FoxG1-HA-2A-GFP (accession for the Foxg1 insert sequence: [NM\\_001160112](#)) or the empty vector control plentIII-HA-2A-GFP plasmids using Lipofectamine LTX (Thermo Scientific) according to the instructions of the manufacturer. 48 hours post-transfection, cells were washed twice with cold PBS, collected, snap frozen, and stored at -80 °C.

### *Dual Luciferase Reporter Assay*

50.000 N2A cells/well were seeded to 24-well plates overnight and double-transfected the following morning with 2.5 µg pMirGlo luciferase reporter constructs and pLenti-III overexpression plasmid DNA using Lipofectamine LTX (Thermo Scientific) reagent. pMirGlo reporters contained inserts with *Ncald* or *Ldb2* regulatory regions with or without targeted ablation of Fkh or bHLH/E-Box motifs. pLenti-III overexpression constructs contained inserts with a sequence coding for the intact FOXG1 protein (FOXG1 OE) or a protein bereft of the Fkh-binding domain (Foxg1 ΔFKH) (30). Medium was changed after 24 h. 48 h after transfection, cells were washed once with 1X PBS and incubated with 1X passive lysis buffer (Promega) at RT for 20 min, gently agitating. Lysates were loaded in triplicate to 96-well microtiter plates and luminescence was measured in a GloMax 96 microplate luminometer (Promega). Gene expression was measured by firefly luciferase activity (LAR II; Promega) normalized against the renilla luciferase signal (Stop & Glo; Promega), which served as a control. Background noise was filtered out of both signals prior to calculation by subtracting luminosity measured before enzyme injection. All promoter constructs were tested with at least three biological replicates.

### *Luciferase reporter sequences:*

Ldb2

TTAACATGATGTTAATTATTTGTAAATTGTATGTTTGGATACACACTTACTTGAGAGGCATA  
TGTTATATTCAA

Ldb2, Fkh deleted

TTAACATGATGTTAATTAGTAAATTGTATGGGATACACACTTACTTGAGAGGCATATGTTAT  
ATTCAA

Ldb2, E-box deleted

TTAACATGATGTTAATTATTTGTAAATTGTATGTTTGGATACACATTACTTGAGAGGCAGT  
TATATTCAA

Ncald

GGAACAATGCAACCAAATATGGACATTCTATTTAGAAACAGTAATGTTAGCATAACAAGG  
GAGCTTAAAAAAGAAAAAGCTAAATAAATATTAACAGATGGGTGGTCAAATGTTGTTT  
TTCTTTTTAAGCACAAAGCCTTAATCTAAAGCCAAGCAG

Ncald, Fkh deleted

GGAACAATGCAACCAAATATGGACATTCTAAGCAGTAATGTTAGCATAACAAGGGAGCT  
TAAAAAAGAAAAAGCTTATTCAGATGGGTGGTCAAATGTTGTTTTCTTTTTAAGCACA  
AAGCCTTAATCTAAAGCCAAGCAG

Ncald, E-box deleted

GGAACAATGCAACCAAATATGGACATTCTATTTAGAAACAGTAATGTTAGCATAACAAGG  
GAGCTTAAAAAAGAAAAAGCTAAATAAATATTAACAGGGTGGTCAAATGTTGTTTTTC  
TTTTTAAGCACAAAGCCTTAATCTAAAGCCAAGCAG

Ncald, Fkh & E-box deleted

GGAACAATGCAACCAAATATGGACATTCTAAGCAGTAATGTTAGCATAACAAGG  
GAGCTTAAAAAAGAAAAAGCTTATTCAGGGTGGTCAAATGTTGTTTTCTTTTT  
AAGCACAAAGCCTTAATCTAAAGCCAAGCAG

### RNA-seq

Total RNA extracted from mouse hippocampi or DIV11 primary hippocampal neurons were used for RNA-seq. Libraries were prepared using the TruSeq total RNA sample preparation kit from Illumina, following the manufacturer's instructions. The procedure included depletion of rRNA prior double-stranded cDNA synthesis and library preparation. Samples were sequenced on Illumina HiSeq3000 as paired-end 101 bp reads.

| Datasets                                                    | N |
|-------------------------------------------------------------|---|
| E18.5: Foxg1 <sup>cre/+</sup> /Foxg1 <sup>+/+</sup>         | 3 |
| 6 week old: Foxg1 <sup>cre/+</sup> /Foxg1 <sup>+/+</sup>    | 2 |
| DIV11 neurons: Foxg1 <sup>cre/+</sup> /Foxg1 <sup>+/+</sup> | 3 |
| DIV11 neurons: shFoxg1/ shControl                           | 4 |
| DIV11 neurons: shFoxg1+TSA/ shControl+TSA                   | 4 |

For cultured neurons, each replicate (n) came from independent cultures of different litters. For *in vivo* samples, each replicate was from independent mice.

### ChIP-seq

#### *In vivo hippocampal tissue samples*

CA and DG regions of the hippocampus were dissected separately and snap frozen in liquid nitrogen. FOXG1 ChIP-Seq from frozen tissue samples (n=1-2) was performed by Active Motif Services (Carlsbad, CA). In brief, tissue was submerged in PBS + 1% formaldehyde, cut into small pieces and incubated at room temperature (RT) for 15 min. Fixation was stopped by the addition of 125 mM glycine (final concentration). The tissue pieces were subsequently treated with a TissueTearer and finally spun down and washed 2 times in PBS. Chromatin was



isolated by the addition of lysis buffer, followed by disruption with a Dounce homogenizer. Lysates were sonicated and the DNA sheared to an average length of 300-500 bp. Genomic DNA (input) was prepared by treating aliquots of chromatin with RNase, proteinase K and heat for de-crosslinking, followed by ethanol precipitation. Pellets were resuspended and the resulting DNA was quantified on a NanoDrop spectrophotometer. Extrapolation to the original chromatin volume allowed quantitation of the total chromatin yield. An aliquot of chromatin (12 µg) was precleared with protein A agarose beads (Invitrogen). Genomic DNA regions of interest were isolated using 4 µg of antibody against FOXG1 (Active Motif, cat# 61211, lot# 34711001). Complexes were washed, eluted from the beads with SDS buffer, and subjected to RNase and proteinase K treatment. Crosslinks were reversed by incubation overnight at 65°C, and ChIP DNA was purified by phenol-chloroform extraction and ethanol precipitation.

Quantitative PCR (qPCR) reactions were carried out in triplicate on specific genomic regions using SYBR Green Supermix (Bio-Rad). The resulting signals were normalized for primer efficiency by carrying out qPCR for each primer pair using input DNA.

Illumina sequencing libraries were prepared from the ChIP and input DNAs by the standard consecutive enzymatic steps of end-polishing, dA-addition, and adaptor ligation. Steps were performed on an automated system (Apollo 342, Wafergen Biosystems/Takara). After a final PCR amplification step, the resulting DNA libraries were quantified and sequenced on Illumina's NextSeq 500 (75 nt reads, single end).

#### *In vitro primary hippocampal neuron samples*

Wild-type or virally transduced primary hippocampal neurons were fixed and collected for subsequent FOXG1 or NEUROD1 (n=1-2) ChIP-seq experiments according to the instructions of the servicing company (Active Motif, Carlsbad, CA). Briefly, cells were fixed by adding 1/10 volume formaldehyde solution (11% formaldehyde, 0.1 M NaCl, 1 mM EDTA pH=8.0, 50 mM HEPES pH=7.9) directly to the medium and incubated at RT with agitation. Fixation was stopped by adding 1/20 volume 2.5 M Glycine solution (Roth, Germany) and incubating for 5 min at RT. Cells were scraped from the plates and transferred into conical tubes, and centrifuged at 800 rpm at 4°C for 10 min. Cells were resuspended and washed twice in chilled PBS-Igepal solution (0.5% Igepal CA-360 (Sigma) in 1X PBS pH 7.4 (Gibco), and a third time in PBS-Igepal-PMSF (phenylmethylsulfonyl fluoride) solution (0.5% Igepal, 1 mM PMSF (Sigma) in 1X PBS pH 7.4). The supernatant was completely removed and cell pellets were snap frozen in liquid nitrogen and stored at -80°C until following ChIP-seq experiments by Active Motif, as described above.

ChIP-seq libraries were generated from ChIP-DNA using a custom Illumina library type on an automated system (Apollo 342, Wafergen Biosystems/Takara). ChIP-seq libraries were sequenced on Illumina NextSeq 500 as single-end 75bp reads (Active Motif, Carlsbad, CA).

#### *RELACS ChIP-seq*

Restriction enzyme-based labeling of chromatin *in situ* (RELACS) was used for H3K27ac (n=2) and H3K4me3 (n=2) ChIP-sequencing (5). DIV11 primary hippocampal neurons with FOXG1 or luciferase KD were fixed in 1% formaldehyde for 15 min. The reaction was stopped with 125 mM glycine for 5 min, followed by two-time DPBS +PIC washes. Cell nuclei were isolated following the NEXSON protocol (treatment time 20 s) and permeabilized with 0.5% SDS (2). Chromatin was digested *in situ* using five units of restriction enzyme CviKI-1 (NEB, R0710S) every 100,000 nuclei and RELACS custom barcodes (4 bp UMI + 8 bp RELACS barcode) were ligated to end-repaired and A-tailed chromatin using components from NEBNext Ultra II DNA Library Prep Kit for Illumina (NEB) (2).

The barcoded chromatin fragments were extracted by sonication for 5 min using these parameters: peak power 105 W, 2% duty factor, 200 cycles/burst (Covaris microtubes (520185), Covaris E220 Focused-ultrasonicator). A single immunoprecipitation (IP) reaction for all pooled samples was carried out on SX-8G Compact IP-Star platform (Diagenode) following Arrigoni et al. (5). Immunoprecipitated chromatin was used for NGS library preparation (NEBNext Ultra II DNA Library Prep Kit for Illumina, NEB). Libraries were sequenced using HiSeq 3000 (Illumina) as 75 bp reads.

### *ATAC-seq*

ATAC-seq was performed on DIV11 primary hippocampal neurons after FOXP1 or luciferase KD (n=2) following the protocol of Buenrostro et al., 2015 (5). Briefly, cells were washed with PBS and detached by 5 min 0.05% trypsin incubation. Dissociation was stopped with 10% FBS and cells were collected and centrifuged for 5 min at 500 rpm at 4°C. After one time wash with ice-cold PBS, cells were counted and separated into 5x10<sup>5</sup> cells/replicate/condition. Cells were resuspended in lysis buffer (10 mM Tris-HCl pH 7.4, 10 mM NaCl, 3 mM MgCl<sub>2</sub>, 0.1% Igepal Ca-630) and immediately centrifuged for 10 min at 500 rpm at 4°C. Transposition, PCR amplification and DNA library preparation were done using Nextera DNA library prep kit according to the manufacturer's instructions (Illumina). DNA was purified and eluted using MinElute PCR purification kit (Qiagen). Libraries were sequenced using HiSeq 3000 (Illumina) (paired-end 100bp reads).

### *Statistics*

GraphPad Prism software (version 9.1.1) was used for statistical analyses. Two-way ANOVA followed by Tukey multiple comparisons was used for the analyses of dual luciferase assay and *in vivo* TSA qRT-PCR experiment. One-way ANOVA or unpaired t-test was used for immunoblots and qRT-PCR analysis. Fisher's exact test was used to test the enrichment of DEGs in clusters and datasets using the *GeneOverlap* (6) package in R Bioconductor (v. 3.8). *bedtools FisherBed* (7) was used to test the overlap between *in vivo* and *in vitro* FOXP1 peak datasets.

### *Artwork*

The illustrations were created with Biorender.com.

### *Bioinformatics, data repository and analyses of public databases*

The "Differential Search" tool of the Allen Brain Atlas (8) was used to define field-specific gene expression. The respective subfield was set as target structure and the other fields as contrast structure. The emerging list was visually inspected with ISH datasets to confirm selective expression in the field as well as overall expression. Assignment to a field was performed according to a clearly visible ISH signal. From this list, we compiled the subset of genes tested in qRT-PCR analysis.

The sequencing data from RNA-, ATAC-, RELACS-, and wildtype ChIP-seq were processed with *snakePipes* (v. 1.1.1) (9). Summary of quality control is available at <https://github.com/Vogel-lab/Integrative-multi-omics-analyses-of-FOXP1-functions>. Mapping was performed on mouse genome build mm10 (GRCm38). For ChIP-Seq and ATAC-seq, high quality and uniquely mapping reads were retained (mapq > 5). RELACS custom barcodes were designed with integrated UMI, so duplicate removal was performed using *UMITools* (10), while standard deduplication was applied for ATAC-seq reads. For ChIP-seq and ATAC-seq

data, *snakePipes* also provided candidate peak regions using *MACS2* (v. 2.2.6) using default parameters.

Differential expression analysis for RNA-seq was done using *DESeq2* (v. 1.22.1) (11) on count matrices output from *snakePipes* (*featureCounts*, v. 1.6.4) (12). A linear model controlling for batch effects (e.g.,  $\sim$ batch + treatment or  $\sim$  batch + condition) was used and *apeglm*  $\log_2$ (Fold Change) shrinkage was applied.

Differential ChIP-seq and ATAC-seq analyses were performed on consensus peak sets, coverage was computed using *multiBamSummary* (*deeptools*) (13) and differential regions were identified via *csaw* (v. 3.13) (14).

The sequencing data from FOXG1 and NEUROD1 ChIP-seq after NEUROD1 or FOXG1 KD were uploaded to the Galaxy web platform, and the public server at usegalaxy.eu was used to analyze the data (15). Same parameters were applied for quality control and mapping as the SnakePipes analyses. Peaks were called using *MACS2 callpeak* (Galaxy Version 2.1.1.20160309.6). Coverage was computed using *multiBamSummary*, and bam files were normalized by *bamcompare* and *bigwigcompare* (*deeptools*, Galaxy Version 3.3.2.0.0) (13). Differential binding regions of NEUROD1 were computed using *DiffBind* (Galaxy Version 2.10.0) (16).

All metaprofiles and heatmaps of ChIP- and ATAC-seq signals were generated with *deeptools* (Galaxy Version 3.3.2.0.0) (13). All ChIP- and ATAC-seq peaks were annotated and visualized using *ChIPSeeker* (Galaxy Version 1.18.0) (17).

Upset plots of peak interval overlaps was done using *Intervene* (Galaxy Version 0.6.5) (18), and the statistics analysis of the overlaps was done using *bedtools FisherBed* (Galaxy Version 2.30.0) (7).

*GimmeMotifs* (v.0.13.1 and v.0.16.0) was used for motif enrichment and differential motif analysis (19).

GO enrichment and differential GO-term analyses were performed using *clusterProfiler* (v. 4.2.2) (20).

Visualizations were done in Galaxy, R (v. 4.1) and Python (v. 3.6). Heatmaps were plotted using *heatmap2* (Galaxy Version 3.0.1) or *pheatmap* (21), volcano plots using *EnhancedVolcano* (BioConductor, v. 3.13) (22), violin plots using *ggplot2* (v. 3.3.5) (23), and Venn diagrams using *ggVenn* (24) and *VennDiagram* (25) packages. Fisher's exact test was applied to DEGs and clustered peak overlaps using the *GeneOverlap* (v. 3.8) (6).

### *Hipposeq*

Hipposeq (26) was accessed at <http://hipposeq.janelia.org/> choosing the dorsal-ventral survey of hippocampal principal cells. Dorsal and ventral populations of CA1, CA2 and CA3 were chosen and the gene names were entered as a list using the standard settings of the database, and the count matrix was normalized as transcripts per million (TPM). The set of genes with significant increase or decrease in expression from our RNA-seq were intersected with the TPM normalized count matrix from hipposeq. The genes found in the intersection were clustered using hierarchical clustering on the row-wise Z score.

### *STRING database*

STRING database (27) was used to explore known and predicted protein-protein interactions of FOXG1 in *Mus musculus*. Data from experiments and databases were used with medium confidence (0.4) for the interaction scores. Nodes annotated interactor proteins, while edges

connected interacting proteins. Line thickness indicated the confidence of interaction. The interactome layout was reorganized in Cytoscape (v 3.8.2) to depict direct interactions of FOXG1 with HDACs and HATs.

*Supplementary Figures:*

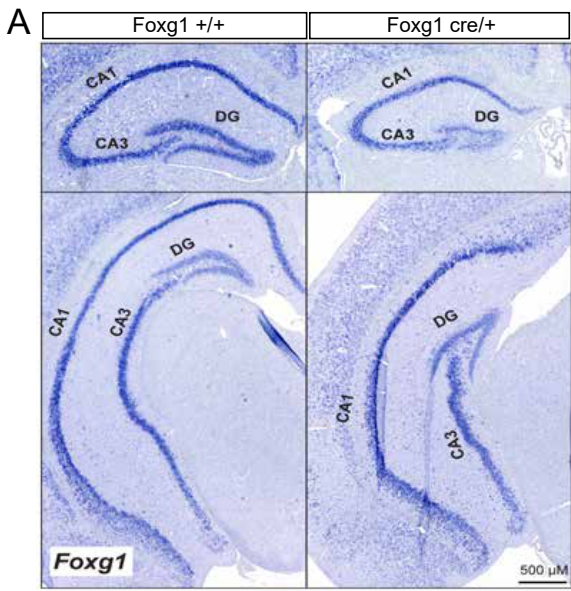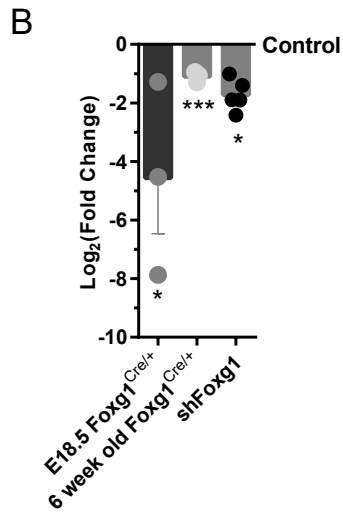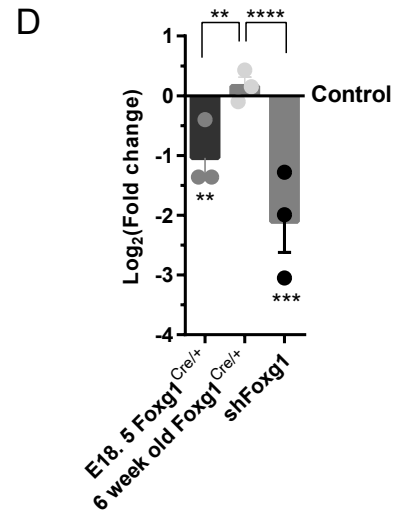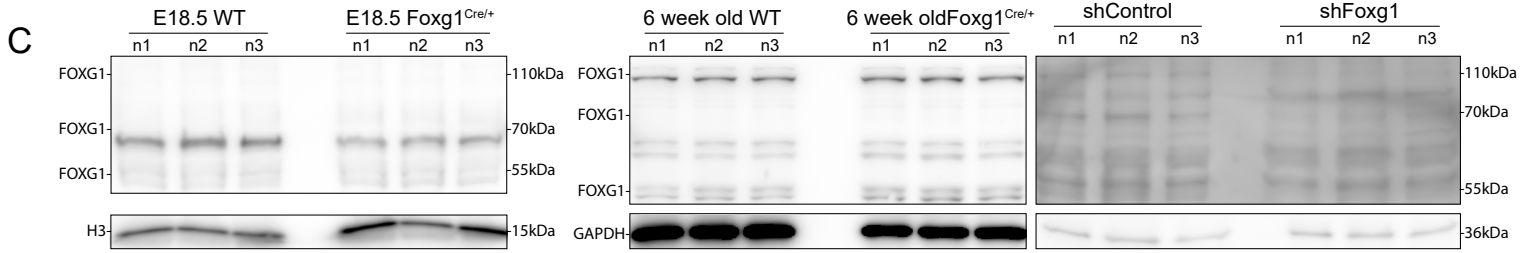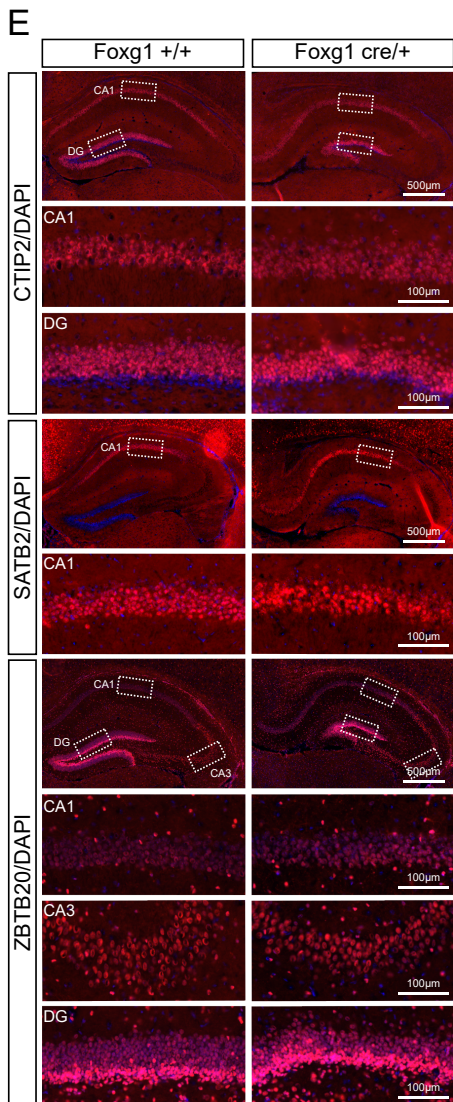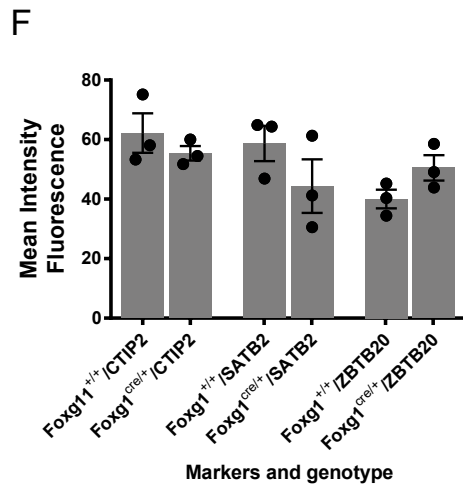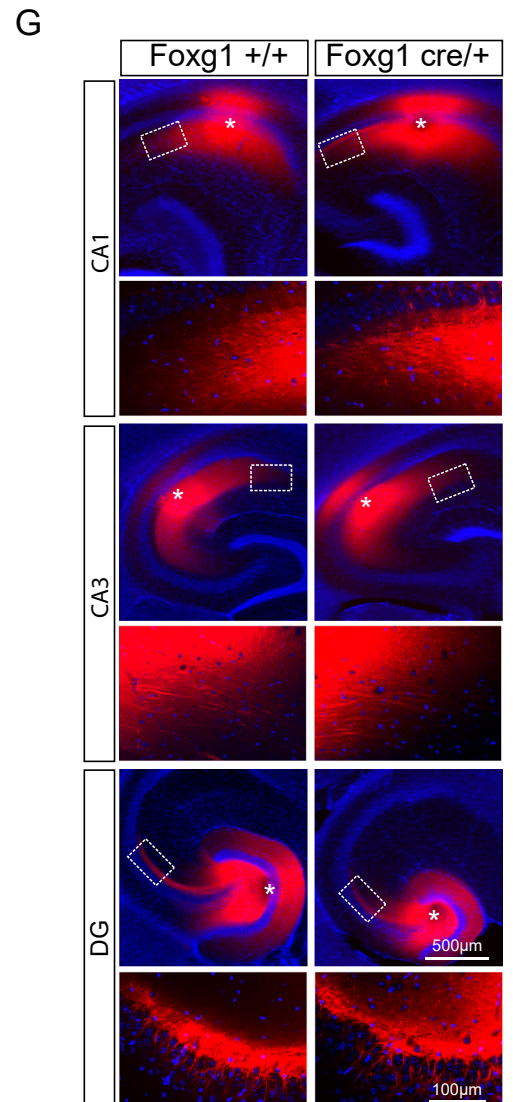

Supplementary Figure Legends:

**Figure S1: Characterization of gene expression levels of FOXG1<sup>cre/+</sup> adult mouse hippocampus and upon FOXG1 KD in primary hippocampal neurons.**

**(A)** Expression pattern of *Foxg1* in the 6 week old *Foxg1*<sup>+/+</sup> (left, control) and *Foxg1*<sup>cre/+</sup> (right) mouse hippocampus was detected by in situ hybridization. *Foxg1* was expressed in both the dentate gyrus (DG), and in the granule cells of the CA fields. *Foxg1*<sup>cre/+</sup> mice had smaller hippocampus, although the CA and DG fields were preserved (n=3). **(B)** qRTPCR quantification of *Foxg1* mRNA levels in E18.5 and 6 week old *Foxg1*<sup>cre/+</sup> hippocampus compared to sh*Foxg1* knockdown of FOXG1 in DIV11 hippocampal neurons compared to control. Y-axis: LFC. **(C)** Immunoblots of FOXG1 of *in vivo* E18.5 and 6 weeks old (*Foxg1*<sup>+/+</sup>, *Foxg1*<sup>cre/+</sup>), and *in vitro* (sh*Foxg1* and shLuciferase) samples (n=3). FOXG1 bands are at 110, 70 and 55 kDa. **(D)** Quantification of the immunoblot in (B). Y-axis: LFC. One-way ANOVA with Tukey's multiple comparisons \*: p<0.05, \*\*: p<0.01, \*\*\*: p<0.001. **(E)** Immunostainings of 3 week old brains of *Foxg1*<sup>cre/+</sup> and *Foxg1*<sup>+/+</sup> for SATB2, CTIP2 and ZBTB20. The first row of images in each panel shows an overview of the hippocampus. The lower rows represent a magnification of the indicated regions in the overviews (n= 3). **(F)** Quantification of SATB2, CTIP2 and ZBTB20 stainings in (B) showed no significant difference between *Foxg1*<sup>cre/+</sup> and *Foxg1*<sup>+/+</sup>. Y-axis shows the mean intensity of fluorescence and x-axis shows the markers and the genotypes that are quantified (dark gray: *Foxg1*<sup>+/+</sup>, light gray: *Foxg1*<sup>cre/+</sup>). Unpaired t-test. **(G)** Dil tracing in CA1, CA3, and DG in 7 week old mice shows that haploinsufficiency of *Foxg1* did not affect intra-hippocampal connectivity (*Foxg1*<sup>+/+</sup> n=3, *Foxg1*<sup>cre/+</sup> n=5). CA: cornu ammonis, DG: dentate gyrus. Scale bars as indicated within the figures.

A

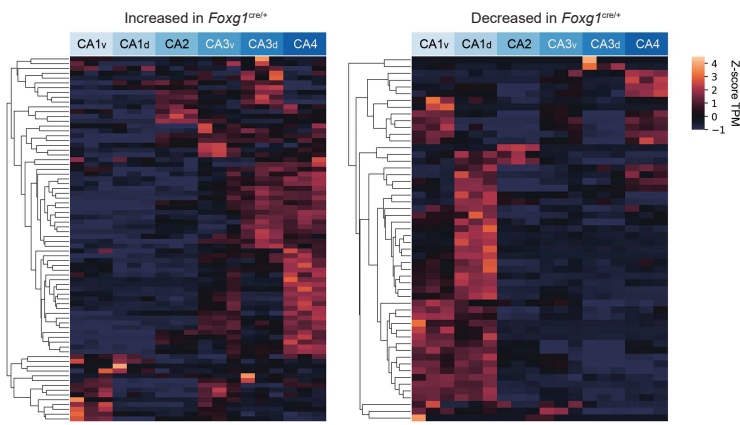

B

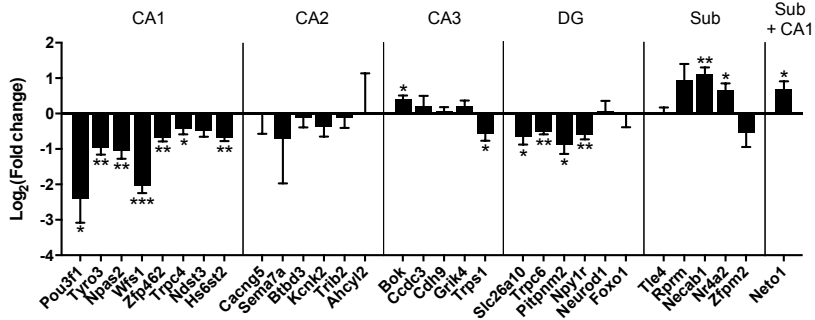

D

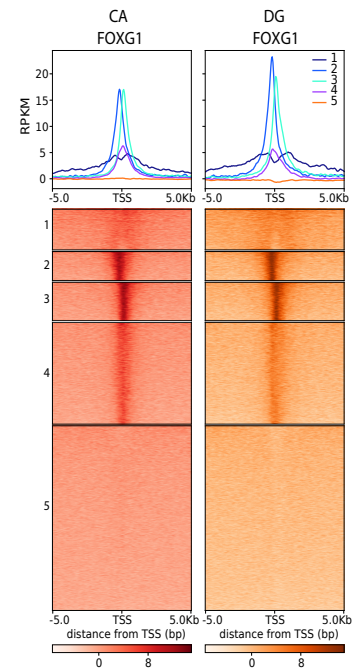

E

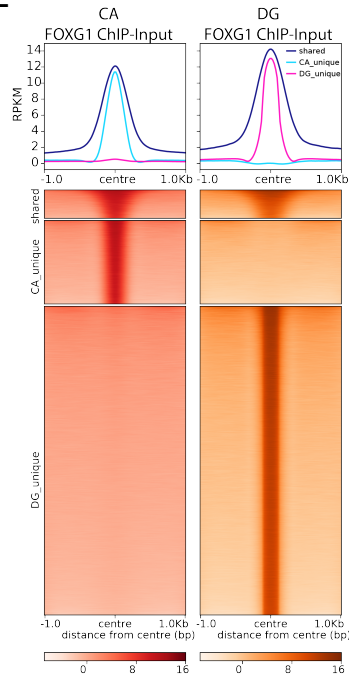

C

FOXG1 in CA-DG shared regions

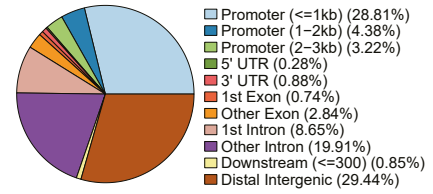

FOXG1 in CA unique regions

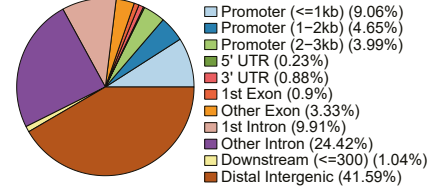

FOXG1 in DG unique regions

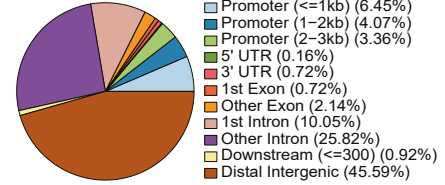

F

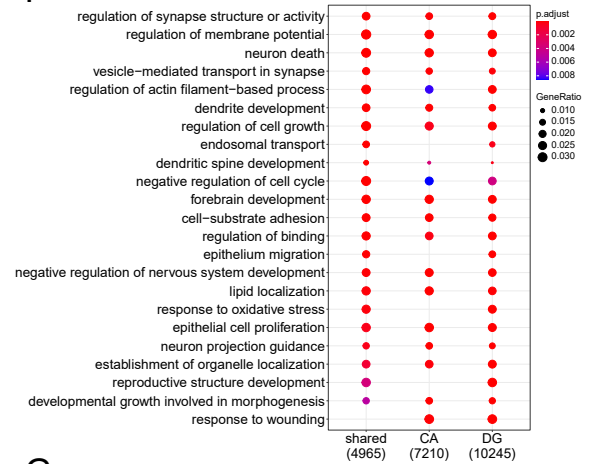

G

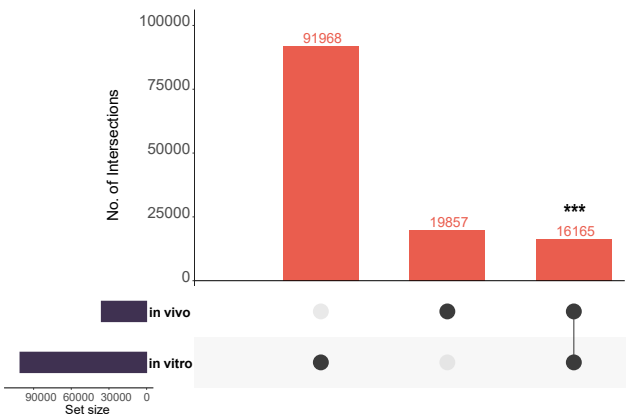



**Figure S2: *Foxg1* haploinsufficiency affects gene expression in the CA fields and DG *in vivo*, but its cistrome is comparable *in vivo* and *in vitro*.**

**(A)** Genes that showed increased expression (left panel) in hippocampus of 6 week old *Foxg1*<sup>cre/+</sup> mice show relatively high expression in CA3/4. Genes that showed decreased expression (right panel) in hippocampus of 6 week old *Foxg1*<sup>cre/+</sup> mice show relatively high expression in CA1, as assessed with *Hipposeq*. **(B)** Expression analysis of marker genes for hippocampal subfields shows that CA1 and DG are most prominently affected after KD of FOXG1. qRTPCR analysis of selected marker genes for hippocampal subfields in hippocampus of 6 week old *Foxg1*<sup>cre/+</sup> mice compared to their respective wild type littermates shows that genes with high expression in CA1 or DG mostly decreased after KD of FOXG1. CA: cornu ammonis, DG: dentate gyrus, sub: subiculum. All qRTPCR data are represented as mean± SEM, n=3-5, \*: p<0.05, \*\*: p<0.01, \*\*\*p<0.001, unpaired Student's t-test. **(C)** Genomic distribution of FOXG1 peaks in CA-DG shared, CA-unique, and DG-unique binding regions represented as pie charts. **(D)** K-means clustering (k=5) of FOXG1 enrichment in CA (red) and DG (orange) regions found 5 Kb up/downstream of TSS of protein coding genes. Data is normalized by sequencing depth and input control. The metaprofiles (top) show the average reads (RPKM) of each cluster. **(E)** Heatmap showing FOXG1 enrichment at binding sites clustered into shared, CA-unique, and DG-unique regions. Data normalization and metaprofiles (top) as in D. **(F)** GO-terms were compared among clusters derived from E. Scales of gene ratio and adjusted p-value are reported at the top right. Total number of genes per cluster are on the x-axis. Threshold for enrichment: p < 0.01 **(G)** Upset plot showing the significant overlap between *in vivo* (CA\_DG combined) and *in vitro* (N1) FOXG1 peaks. \*\*\*p<0.001, *bedtools FisherBed*. (CA: n=2, DG: n=1, *in vitro*: n=1).

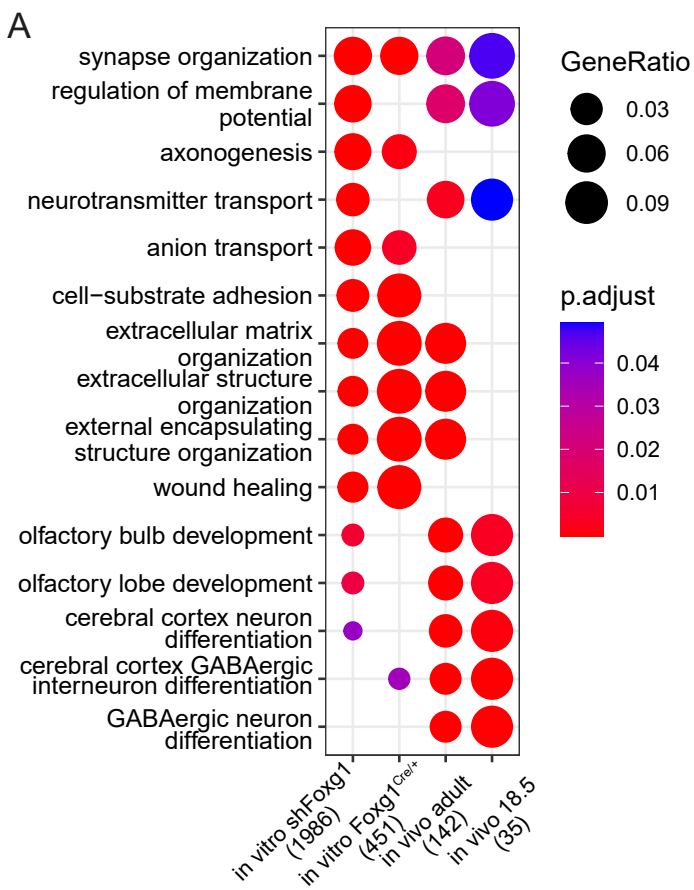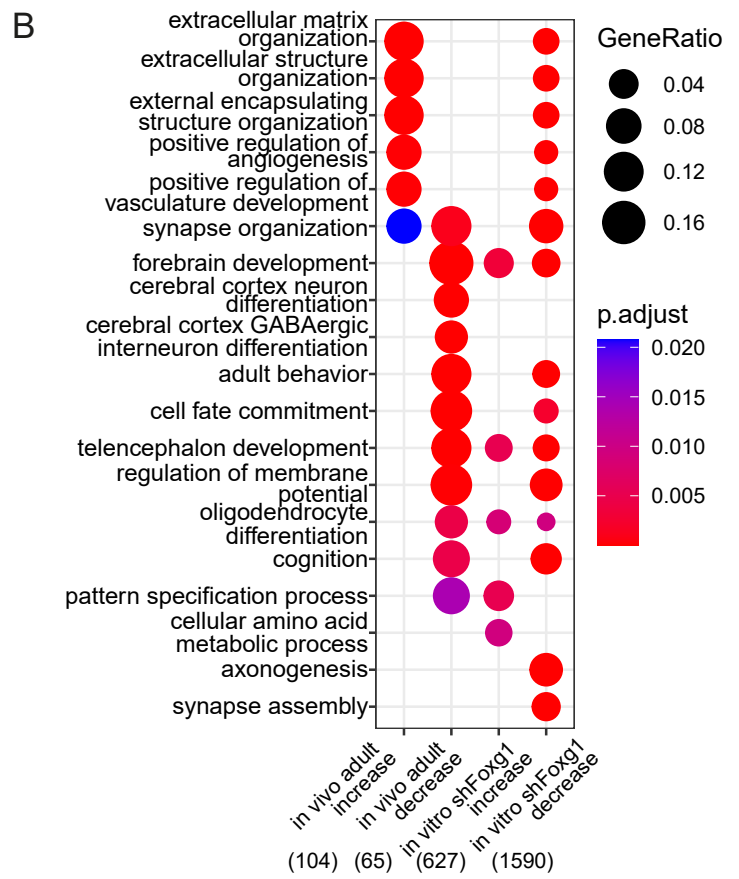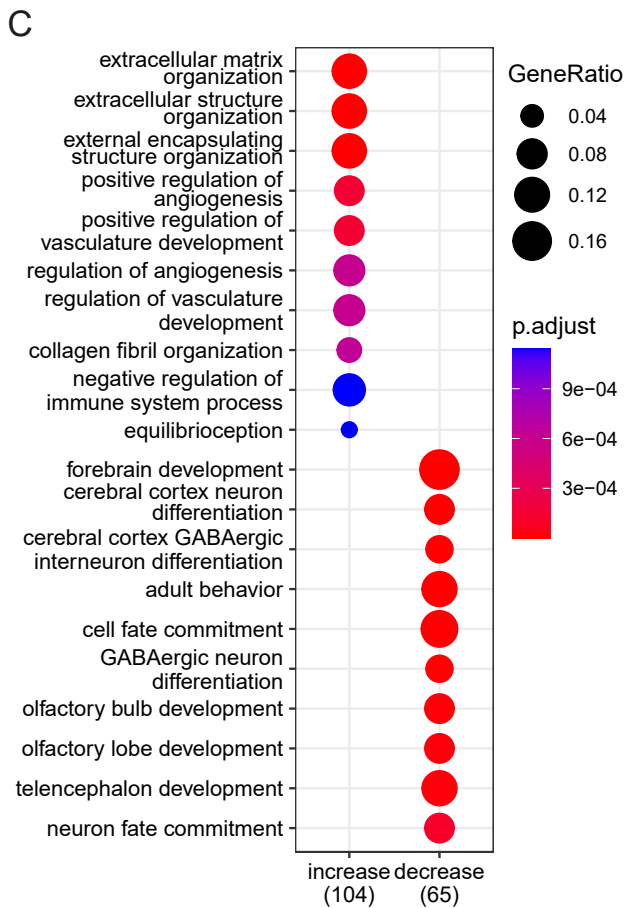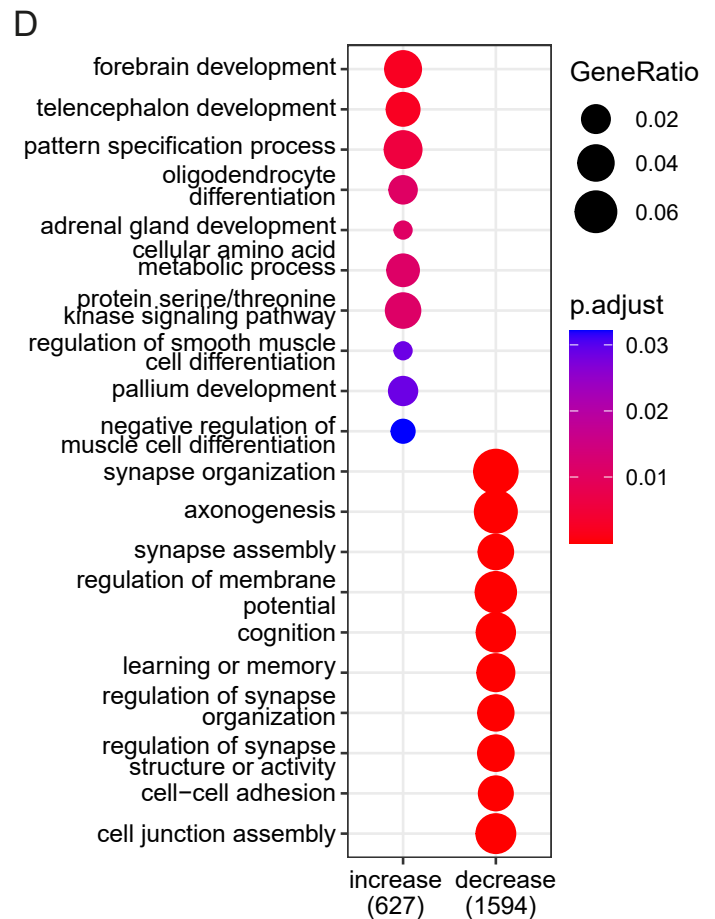

**Figure S3: *Foxg1* haploinsufficiency and shRNA mediated knockdown affect similar and distinct biological functions *in vivo* and *in vitro* and at different developmental stages.**

**(A)** Dotplot of differential GO-term enrichment analysis comparing DEGs in all datasets (*in vitro* shFoxg1/shLuciferase, Foxg1<sup>cre/+</sup>/WT, *in vivo* adult, and E18.5 Foxg1<sup>cre/+</sup>/WT). Total number of genes per group is on the x-axis, dot size displays the gene ratios and color indicates significance level of the enrichment. **(B)** Top ten enriched terms in the fractions of increased and decreased DEGs in the adult Foxg1<sup>cre/+</sup> hippocampus and DIV11 primary neurons upon FOXG1 KD (B) compared simultaneously (C), and separately (D). **(D)** Shows the top ten enriched GO-terms when the increase/decrease fractions are compared within their own datasets, revealing enriched terms that are not in the top ten when the datasets are compared simultaneously. Threshold for enrichment analyses:  $p < 0.05$ .

**A**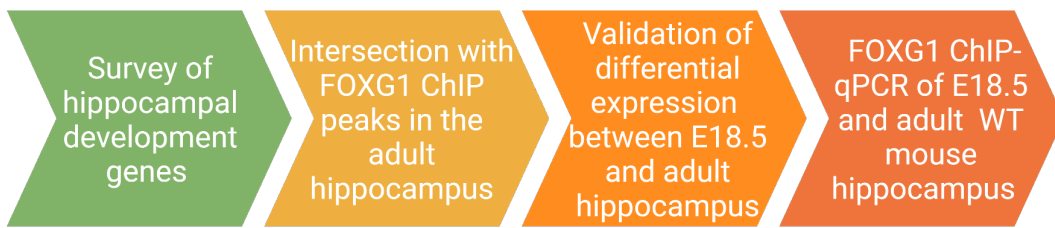**B**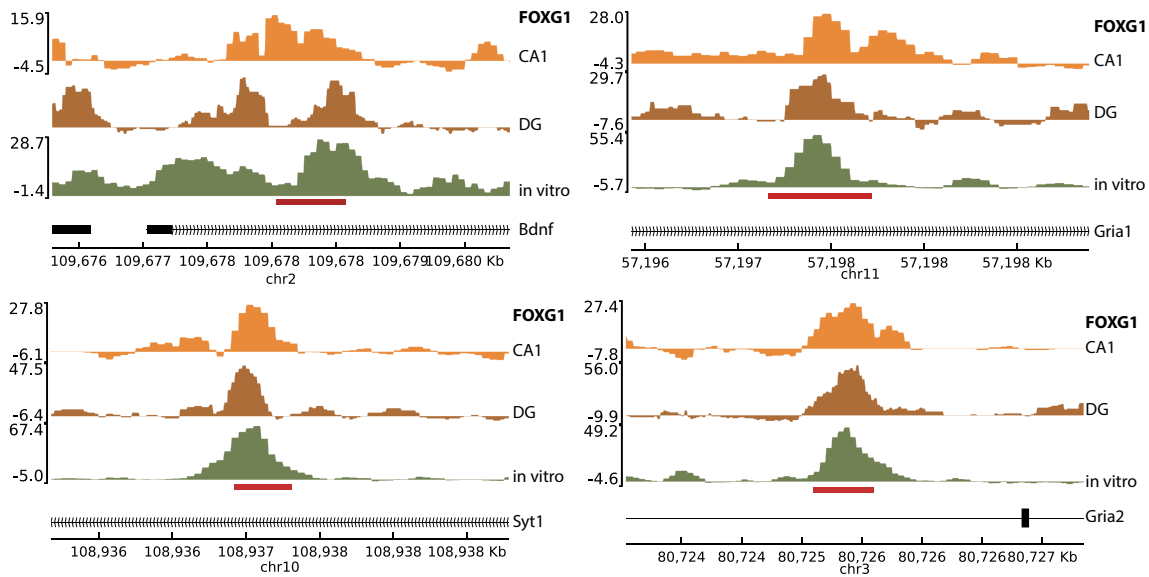**C**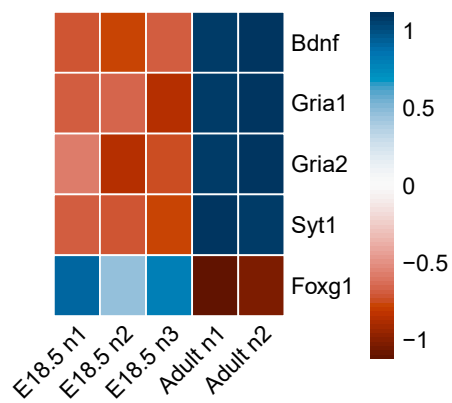**D**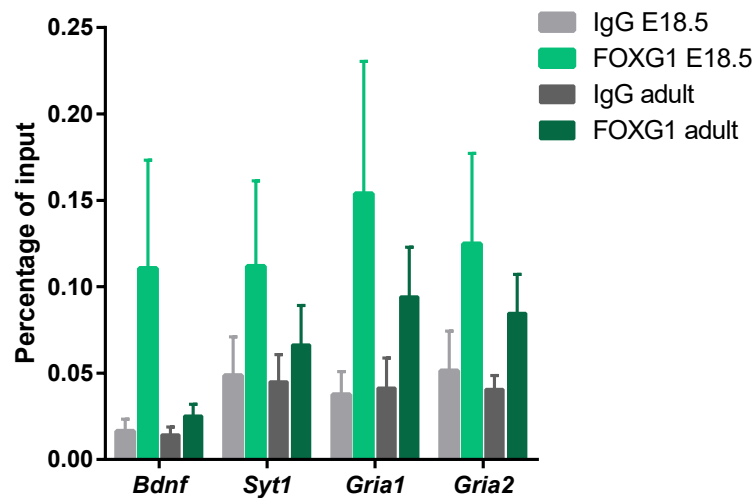**E**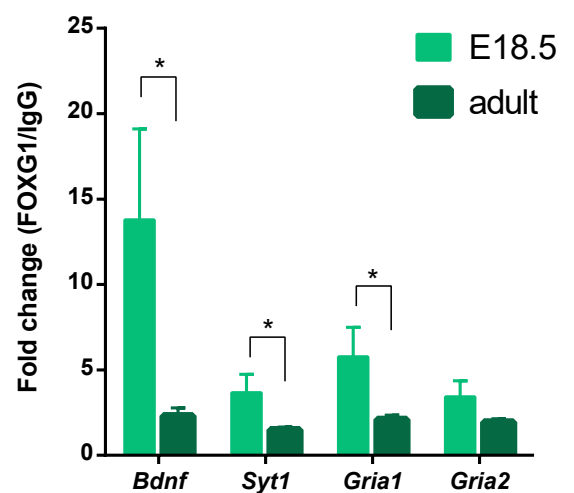

**Figure S4: FOXG1 enrichment on potential hippocampal maturation genes is altered between E18.5 and adult hippocampus.**

**(A)** Pipeline explaining target selection and experimental design. **(B)** Genome browser tracks of CA1 (orange), DG (brown), and *in vitro* (green) FOXG1 peaks at selected target genes: *Bdnf*, *Syt1*, *Gria1*, and *Gria2*. Red line depicts the regions targeted in ChIP-qPCR experiments. **(C)** Heatmap of normalized counts of *Bdnf*, *Syt1*, *Gria1*, *Gria2*, and *Foxg1* in WT E18.5 and adult hippocampi. Scale in rlog normalized counts (*DESeq2*) (E18.5 n= 3, adult n= 2). **(D)** ChIP-qPCR analysis of FOXG1 levels (% Input) of WT E18.5 and adult hippocampi at the target regions of *Bdnf*, *Syt1*, *Gria1*, and *Gria2* from (B) ( $n = 3$ ). **(E)** ChIP-qPCR results represented as fold change (FOXG1-ChIP/IgG). Data represented as mean  $\pm$  SEM. Two-tailed Student's t-test: \* $p < 0.05$ , \*\* $p < 0.01$ , \*\*\* $p < 0.001$ .

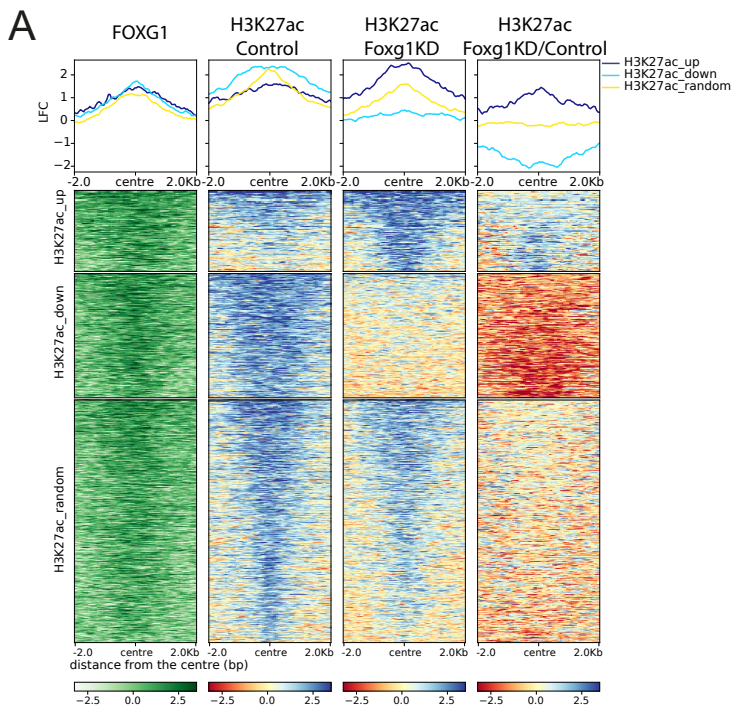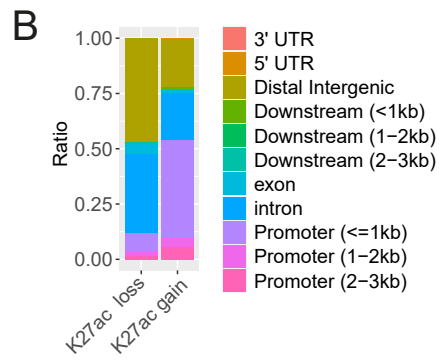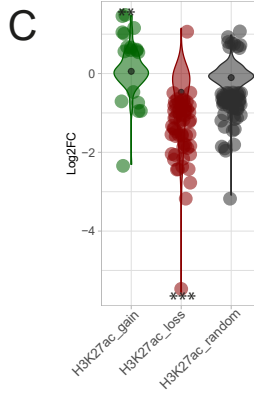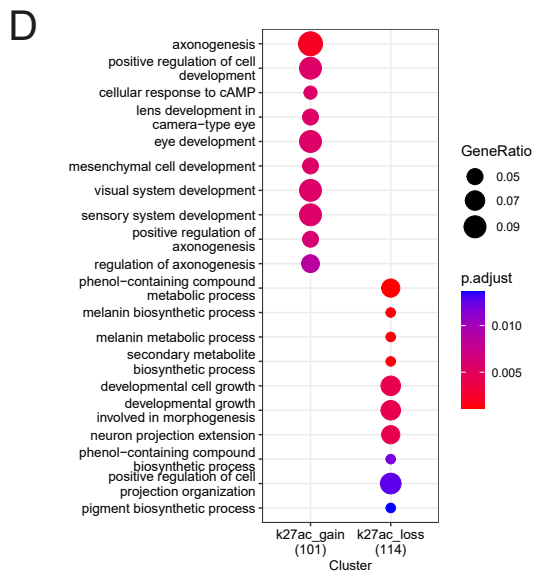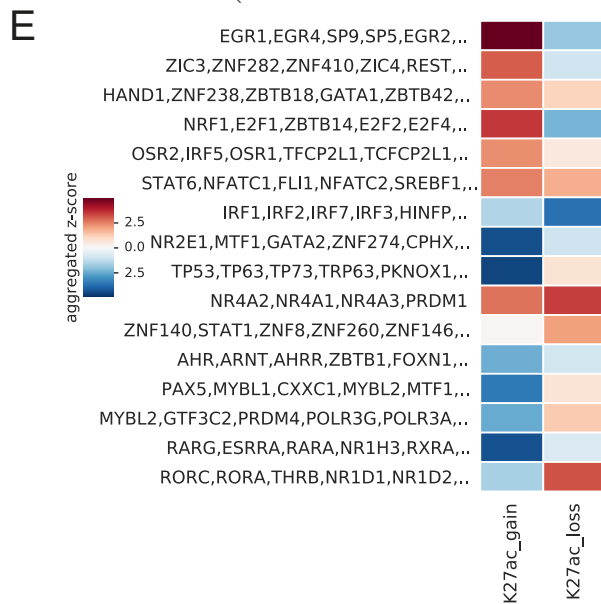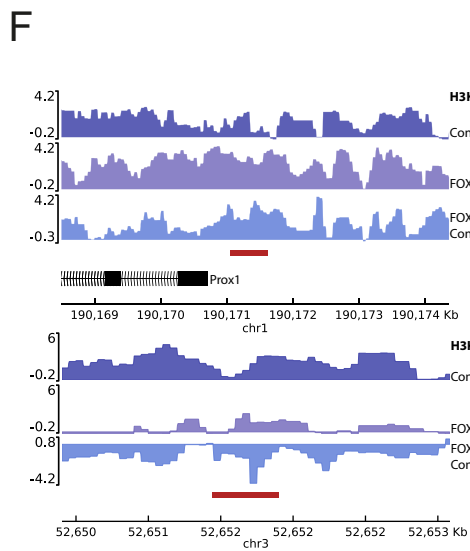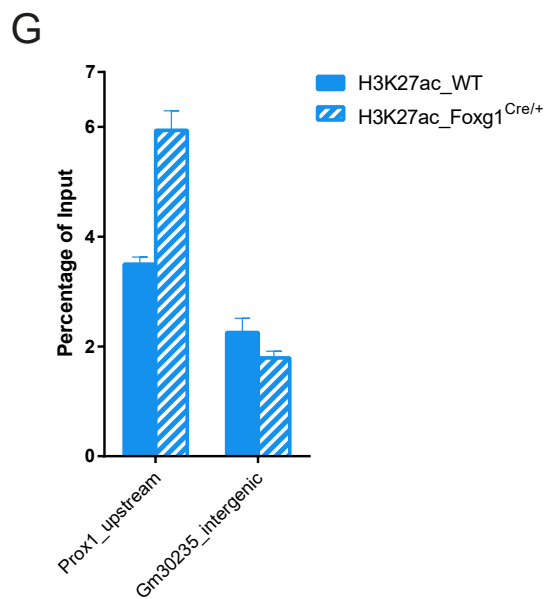

**Figure S5: Reduced FOXG1 levels lead to gain and loss of H3K27ac *in vitro* and *in vivo*.**

**(A)** Heatmap of H3K27ac enrichment at regions retrieved from differential binding analysis of H3K27ac FOXG1 KD/Control (H3K27ac-up, -down, -random). Data is normalized by sequencing depth and input control as  $\log_2$  (ChIP/Input) for H3K27ac control and H3K27ac FOXG1 KD data. The difference between FOXG1 KD and control conditions was calculated from RPKM normalized bigwig files as  $\log_2$  (FOXG1 KD/Control). The metaprofiles (top) show the average  $\log_2$ FC (LFC) of each cluster. **(B)** Genomic distribution of regions gaining and losing H3K27ac enrichment displayed as a stacked bar graph. **(C)** Violin plot depicting the distribution of DEGs upon FOXG1 KD at H3K27ac-gain,-loss and -random clusters as shown in A. Y-axis corresponds to  $\log_2$ FC of gene expression, and x-axis shows the three clusters. The black dot marks the median of  $\log_2$ FC of DEGs in each cluster. *GeneOverlap Fisher's exact test* \*:  $p < 0.05$ , \*\*:  $p < 0.01$ , \*\*\*:  $p < 0.001$ . **(D)** Enriched GO-terms for the respective clusters as shown in A. Scales of gene ratios and adjusted p-value are at top-right corner, and total number of genes per cluster are on the x-axis. Threshold for enrichment analysis was adjusted to  $p < 0.01$ . **(E)** Heatmap showing transcription factor (TF)-binding differential motif analysis according to the clusters of H3K27ac enrichment as shown in A. **(F)** Genome browser tracks of H3K27ac in control, FOXG1 KD and FOXG1 KD/Control conditions at selected target regions for gain (up) and loss (down). Red line depicts the regions targeted in ChIP-qPCR experiments. **(G)** ChIP-qPCR analysis of H3K27ac levels (% Input) of adult WT (solid blue) and Foxg1<sup>cre/+</sup> hippocampi (grated blue) at the target regions from (A) (n= 2). Data represented as mean  $\pm$  SEM.

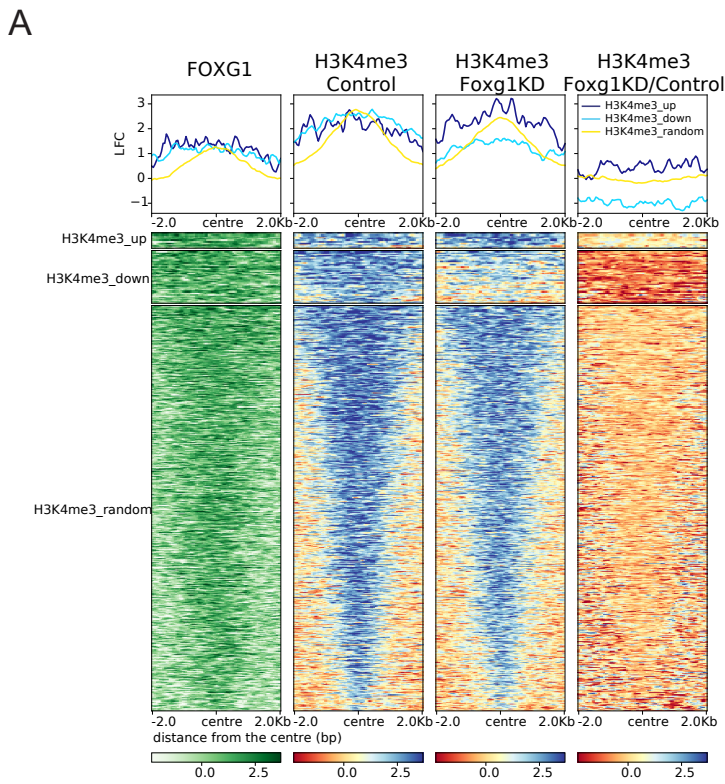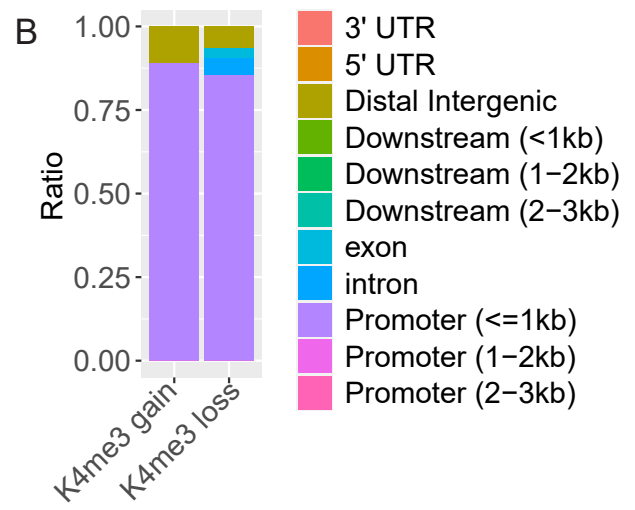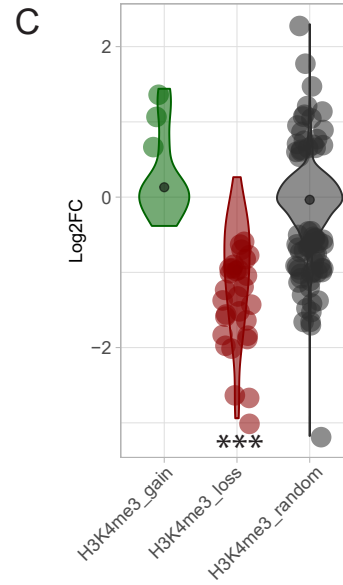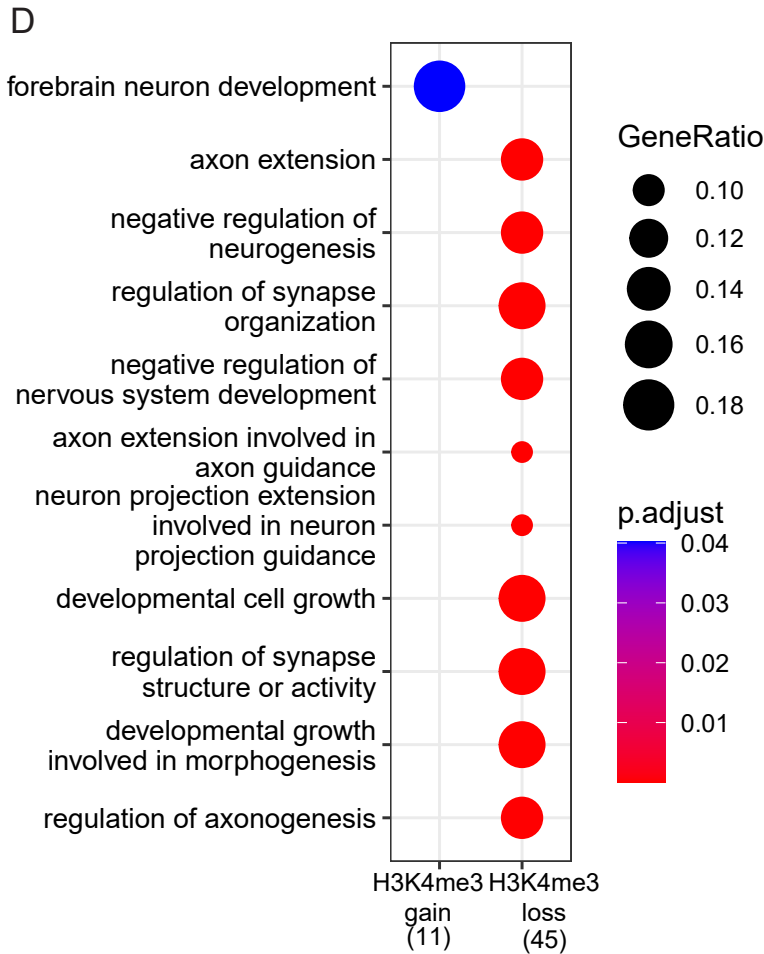



**Figure S6: Reduced FOXG1 levels lead to gain and loss of H3K4me3 *in vitro*.**

**(A)** Heatmap of H3K4me3 enrichment at regions retrieved from differential binding analysis of H3K4me3 FOXG1 KD/Control (H3K4me3-up, -down, -random). Data is normalized by sequencing depth and input control as  $\log_2$  (ChIP/Input) for H3K4me3 control and H3K4me3 FOXG1 KD data. The difference between FOXG1 KD and control conditions was calculated from RPKM normalized bigwig files as  $\log_2$ (FOXG1 KD/Control). The metaprofiles (top) show the average  $\log_2$ FC (LFC) of each cluster. **(B)** Genomic distribution of regions gaining and losing H3K4me3 enrichment displayed as a stacked bar graph. **(C)** Violin plot depicting the distribution of DEGs upon FOXG1 KD at H3K4me3-gain,-loss and -random clusters as shown in A. Y-axis corresponds to  $\log_2$ FC of gene expression, and x-axis shows the three clusters. The black dot marks the median of  $\log_2$ FC of DEGs in each cluster. *GeneOverlap Fisher's exact test* \*:  $p < 0.05$ , \*\*:  $p < 0.01$ , \*\*\*:  $p < 0.001$ . **(D)** Enriched GO-terms for the respective clusters as shown in A. Scales of gene ratios and adjusted p-value are at top-right corner, and total number of genes per cluster are on the x-axis. Threshold for enrichment analysis:  $p < 0.01$ .

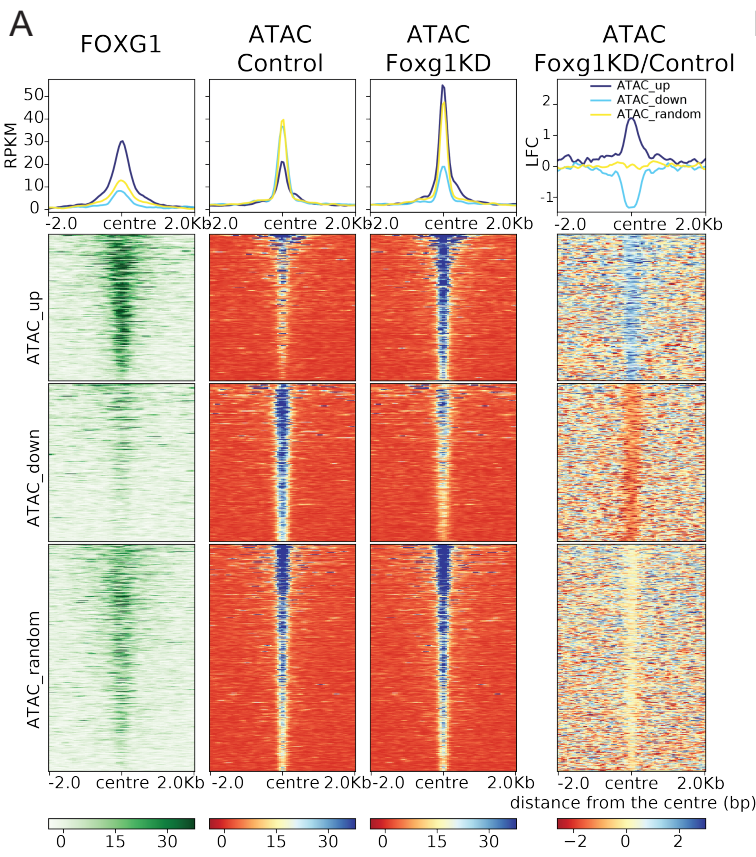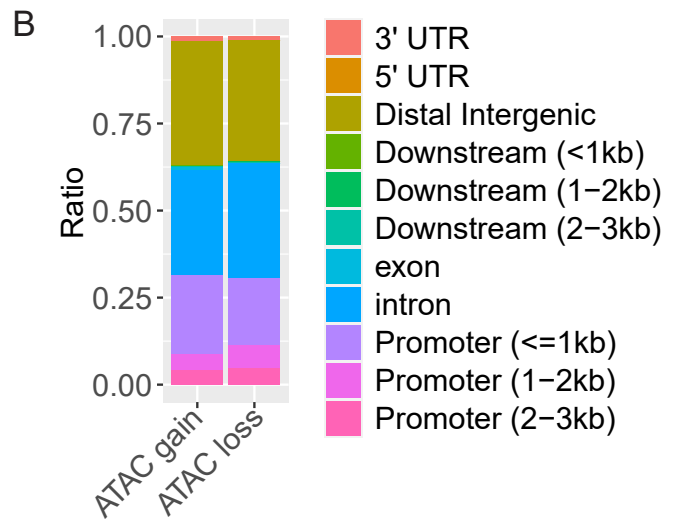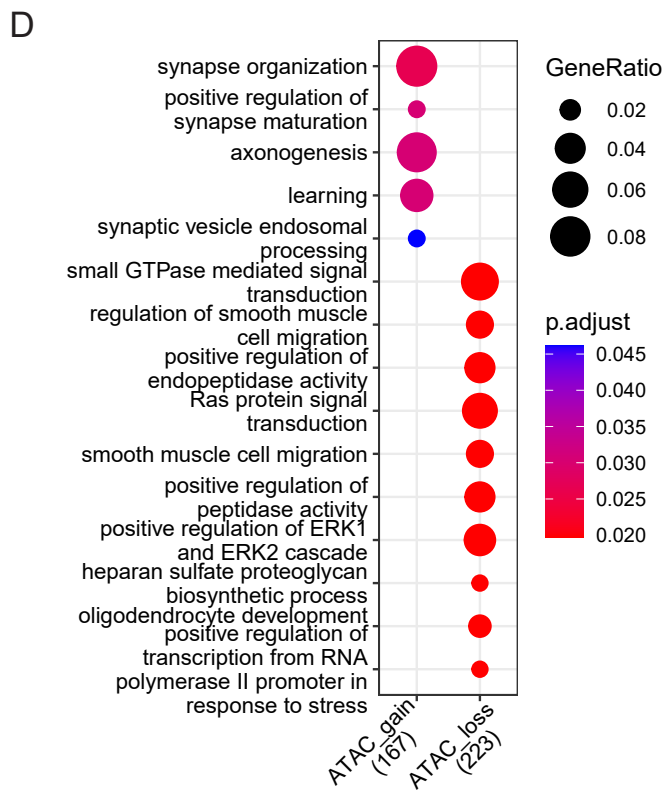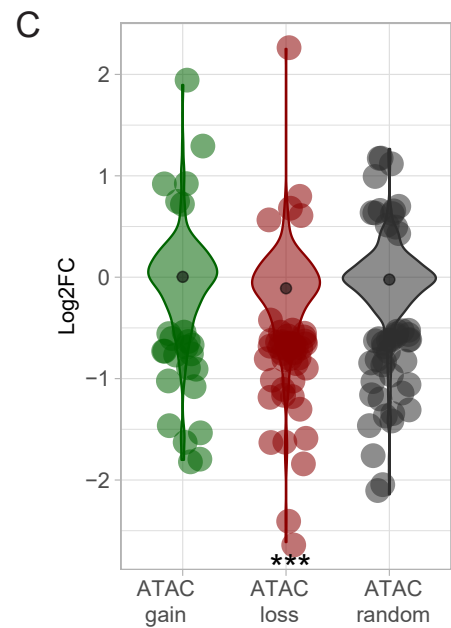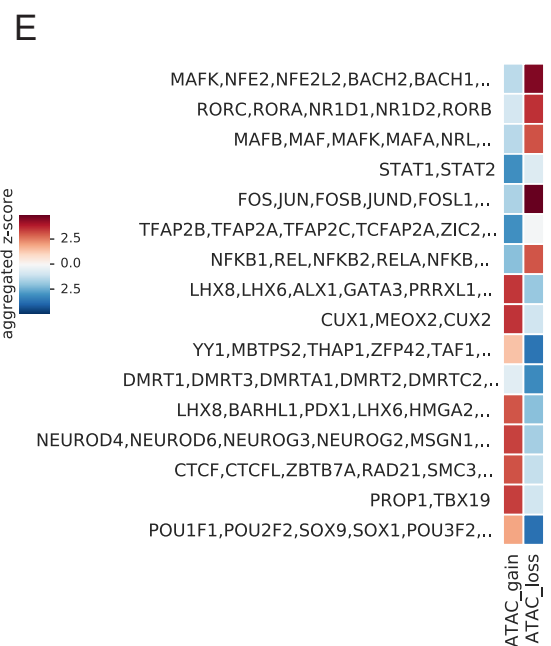

**Figure S7: Reduced FOXG1 levels lead to gain and loss of chromatin accessibility *in vitro*.**

**(A)** Heatmap of chromatin accessibility enrichment at regions retrieved from differential binding analysis of ATAC FOXG1 KD/Control (ATAC-up, -down, -random). Data is normalized by sequencing depth as RPKM for ATAC control and ATAC FOXG1 KD data. The difference between FOXG1 KD and control conditions was calculated from RPKM normalized bigwig files as  $\log_2(\text{FOXG1 KD/Control})$ . The metaprofiles (top) show the average  $\log_2\text{FC}$  (LFC) of each cluster. **(B)** Genomic distribution of regions gaining and losing accessibility displayed as a stacked bar graph. **(C)** Violin plot depicting the distribution of DEGs upon FOXG1 KD at ATAC-gain, -loss and -random clusters as shown in A. Y-axis corresponds to  $\log_2\text{FC}$  of gene expression, and x-axis shows the three clusters. The black dot marks the median of  $\log_2\text{FC}$  of DEGs in each cluster. *GeneOverlap Fisher's exact test* \*:  $p < 0.05$ , \*\*:  $p < 0.01$ , \*\*\*:  $p < 0.001$ . **(D)** Enriched GO-terms for the respective clusters as shown in A. Scales of gene ratios and adjusted p-value are at top-right corner, and total number of genes per cluster are on the x-axis. Threshold for enrichment analysis:  $p < 0.01$ . **(E)** Heatmap showing transcription factor (TF)-binding differential motif analysis according to the clusters of chromatin accessibility as shown in A.

A

### Repression model

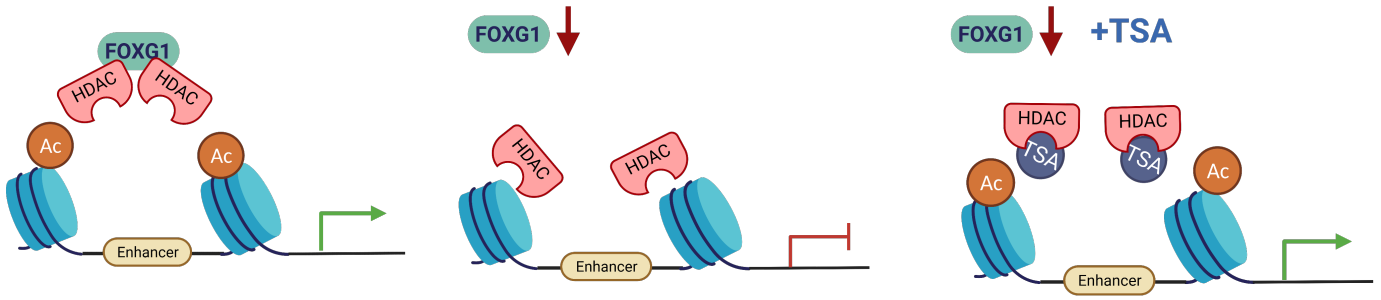

B

### Recruitment model

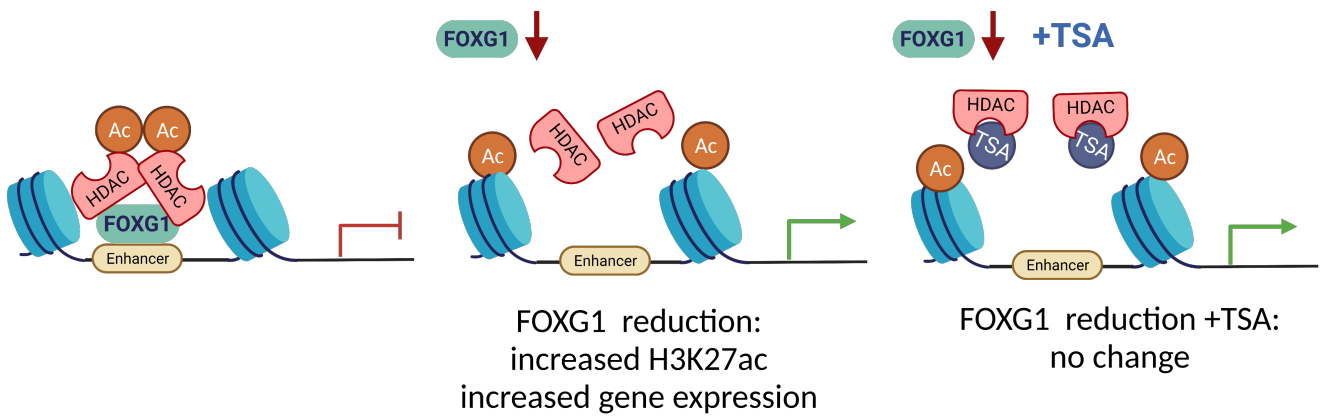

**Figure S8: Repression and recruitment models of HDAC-FOXG1 interaction.**

Graphical summary of the repression **(A)** and recruitment **(B)** models. **(A)** The repression model is independent of FOXG1-binding to the chromatin and predicts that reduced levels of FOXG1 lead to reduced levels of H3K27ac and concomitant transcriptional decrease. Upon HDAC inhibition with TSA, we expect transcriptional increase of genes regulated through the repression model. **(B)** The recruitment model predicts that reduced levels of FOXG1 correlate with increased H3K27ac levels and concomitantly with increased transcription at FOXG1-binding. TSA treatment would not alter transcription upon reduced FOXG1 levels, as inhibition of the HDACs does not occur bound to the chromatin.

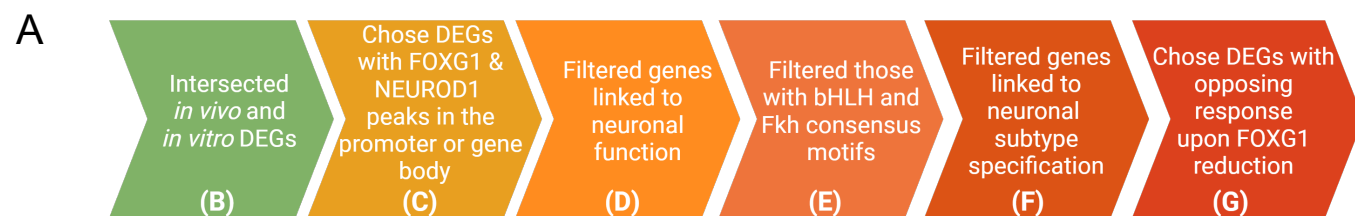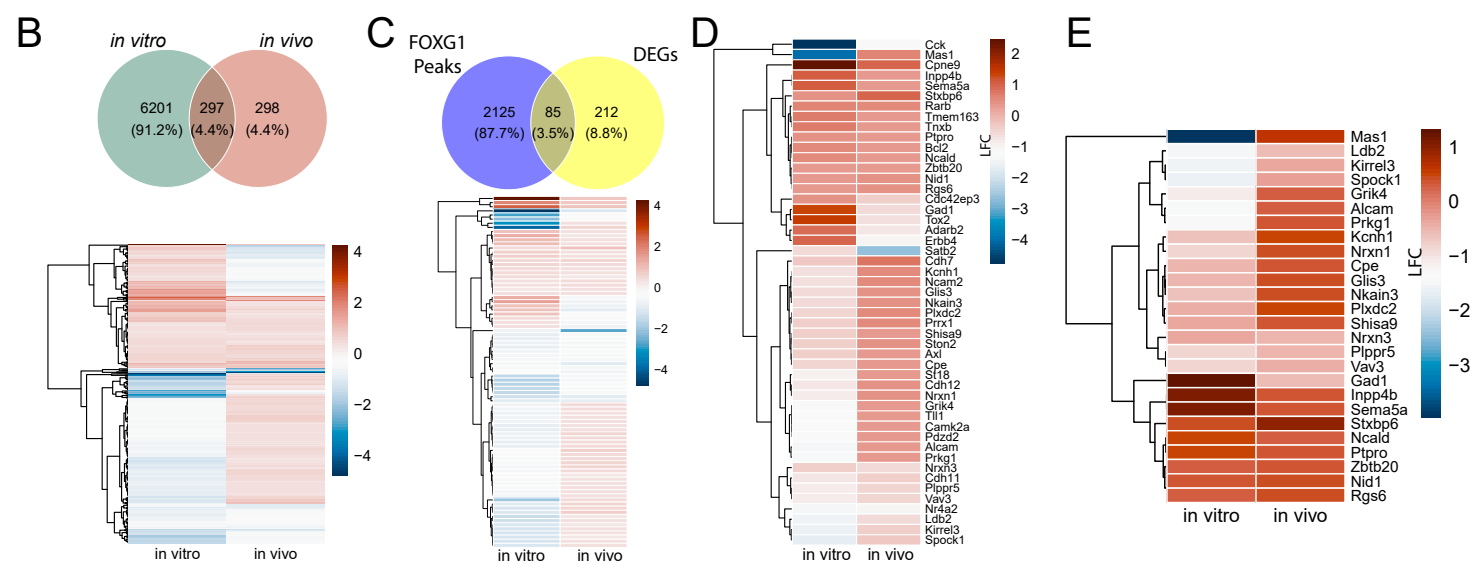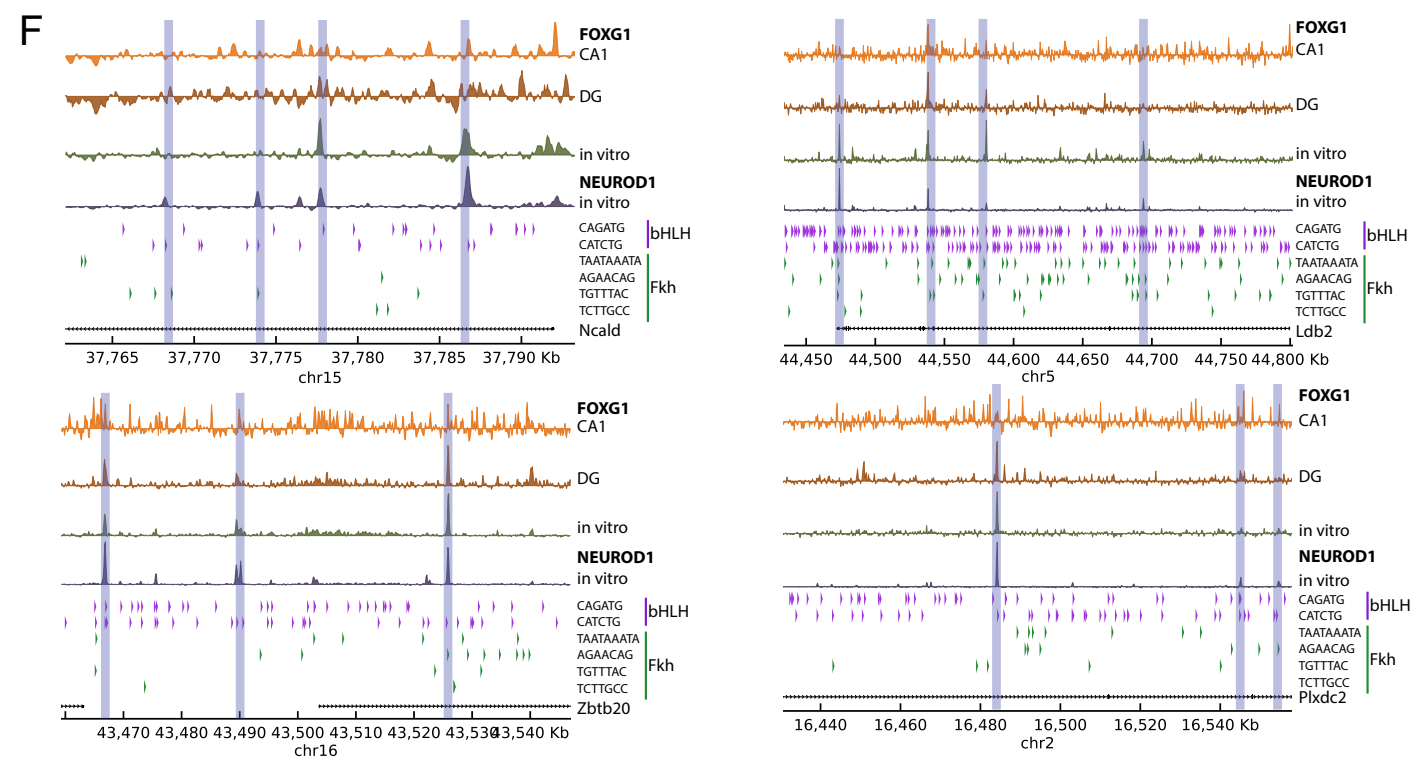

**Figure S9: Determination of *Ldb2* and *Ncald* as FOXG1 regulatory targets.**

(A) Pipeline of analyses used for the determination of potential direct regulatory targets of FOXG1, showing each panel relating to the steps. (B) Intersection of DEGs (LFC cut-off  $\pm 0.3$ ) from *in vivo* and *in vitro* datasets yielded 297 genes shown in the Venn diagram (top). Comparison of expression levels (LFC) between *in vivo* and *in vitro* datasets plotted in a heatmap (bottom). (C) DEGs with FOXG1 and NEUROD1 in the promoter or gene body were chosen, and expression levels were depicted in the heatmap. Scale same as in B. These DEGs were filtered by their link to neuronal function (heatmap) (D) and occurrence of Fkh and bHLH motifs with overlapping FOXG1 and NEUROD1 peaks (heatmap) (E). The FOXG1 and NEUROD1 occupancy was plotted for genes with specific link to neuronal subtype specification and adjacent motifs of bHLH and Fkh motifs within **maximum 200 bp** of each other (*Ncald*, *Ldb2*, *Plxdc2* and *Zbtb20*) (F). (G) *Ldb2* was the only gene that was downregulated upon reduced levels of FOXG1 (activator function of FOXG1), and *Ncald* was chosen for the repressor function of FOXG1 for the luciferase assays in **Figure 5**.





**Figure S10: Fkh and bHLH transcription factors are expressed at moderate levels in N2A cells.**

Heatmap of normalized counts of **(A)** Fkh and **(B)** bHLH TFs in N2A cells (n=3). **(C)** Immunoblot confirming the overexpression of FOXG1 using FOXG1 in N2A cells (n=3).

**A**

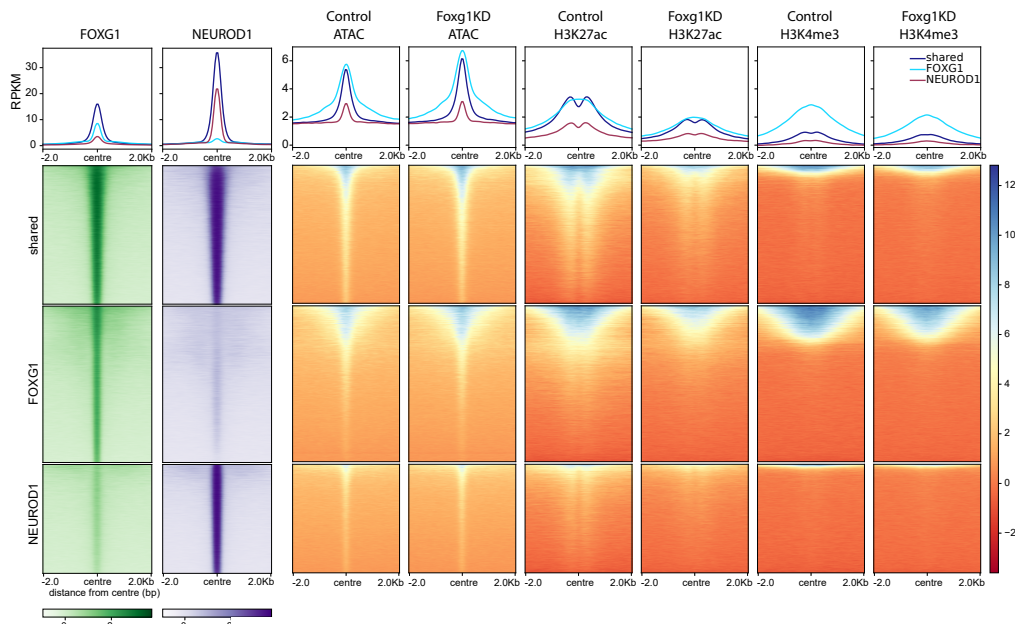

**B**

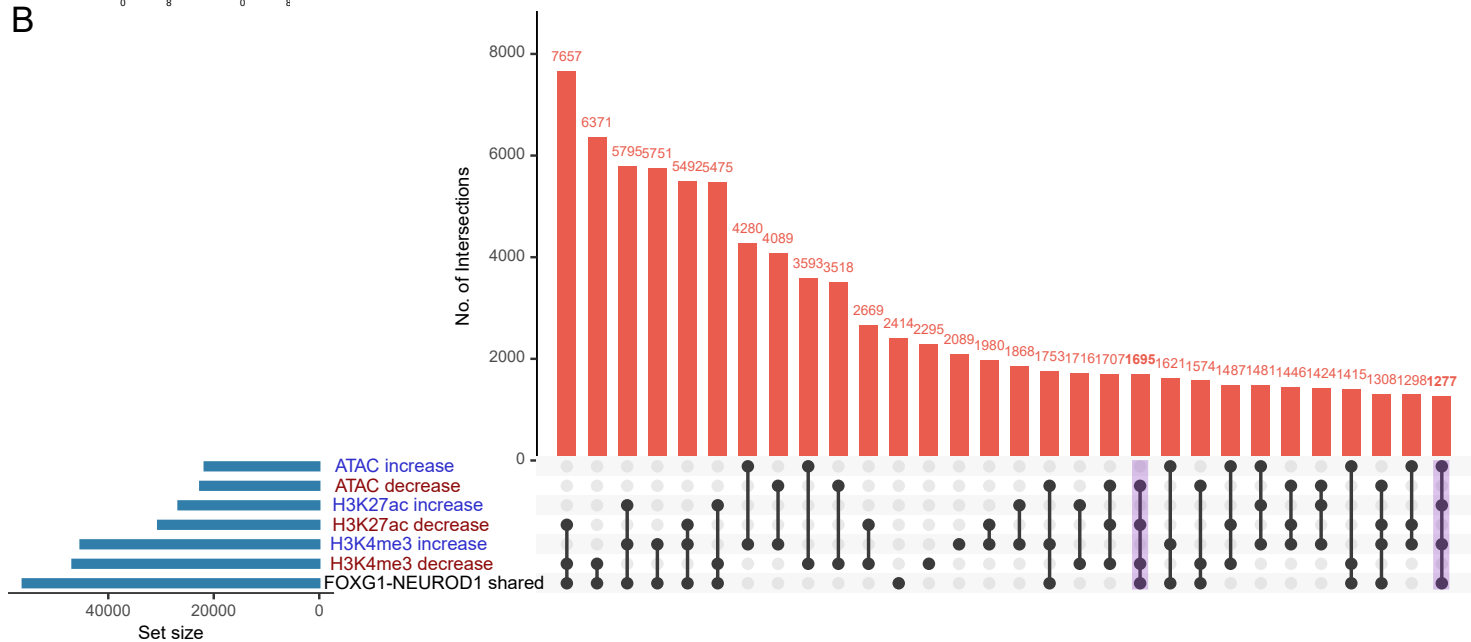

**C**

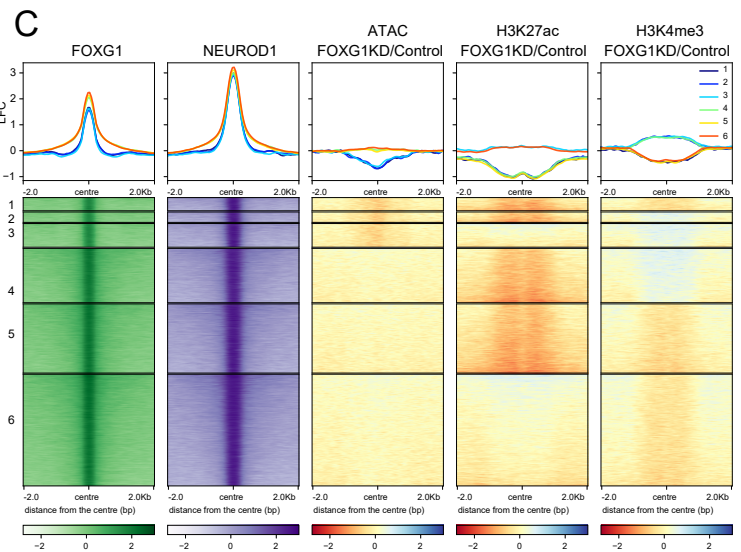

**D**

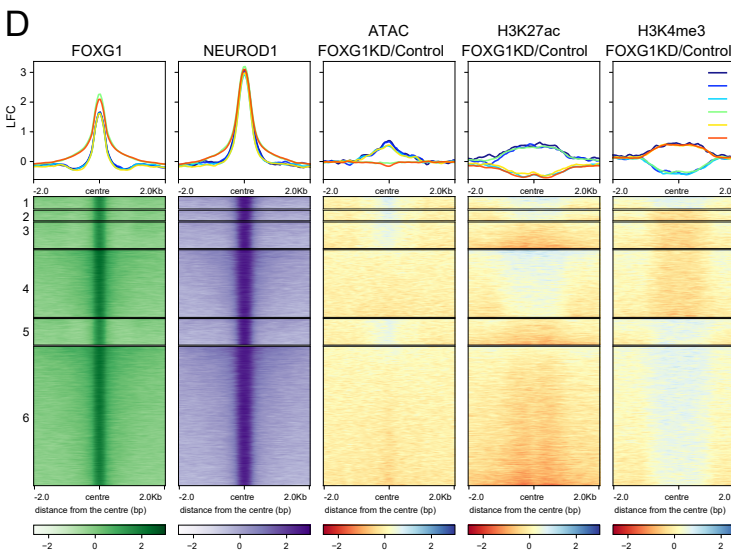

**Figure S11: Reduced FOXG1 levels affect the epigenetic landscape in FOXG1-NEUROD1 shared binding regions.**

**(A)** Heatmap showing chromatin accessibility, H3K27ac, H3K4me3 enrichment at FOXG1 (green) and NEUROD1 (purple) binding sites clustered into shared and unique (FOXG1\_unique, NEUROD1\_unique) regions in control and FOXG1 KD conditions. **(B)** Upset plots depicting the multi-intersection between FOXG1\_unique (top), NEUROD1\_unique (middle), and shared (bottom) binding sites with dynamic clusters of H3K27ac, H3K4me3, and ATAC from Fig. 3. **(C, D)** Heatmaps showing chromatin accessibility, H3K27ac, H3K4me3 enrichment differences between FOXG1 KD/Control conditions ( $\log_2$  (FOXG1 KD/Control)) at sub-clusters of shared FOXG1 and NEUROD1 binding sites. The clusters were retrieved by multi-intersecting the FOXG1-NEUROD1 shared regions with dynamic decrease (C) or increase (D) clusters of H3K27ac, H3K4me3 and ATAC from Fig. 3. Data normalization and metaprofiles (top) as in S5F.

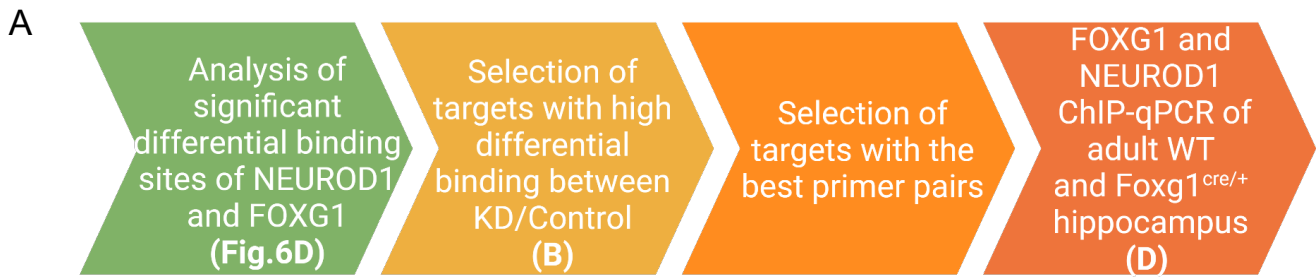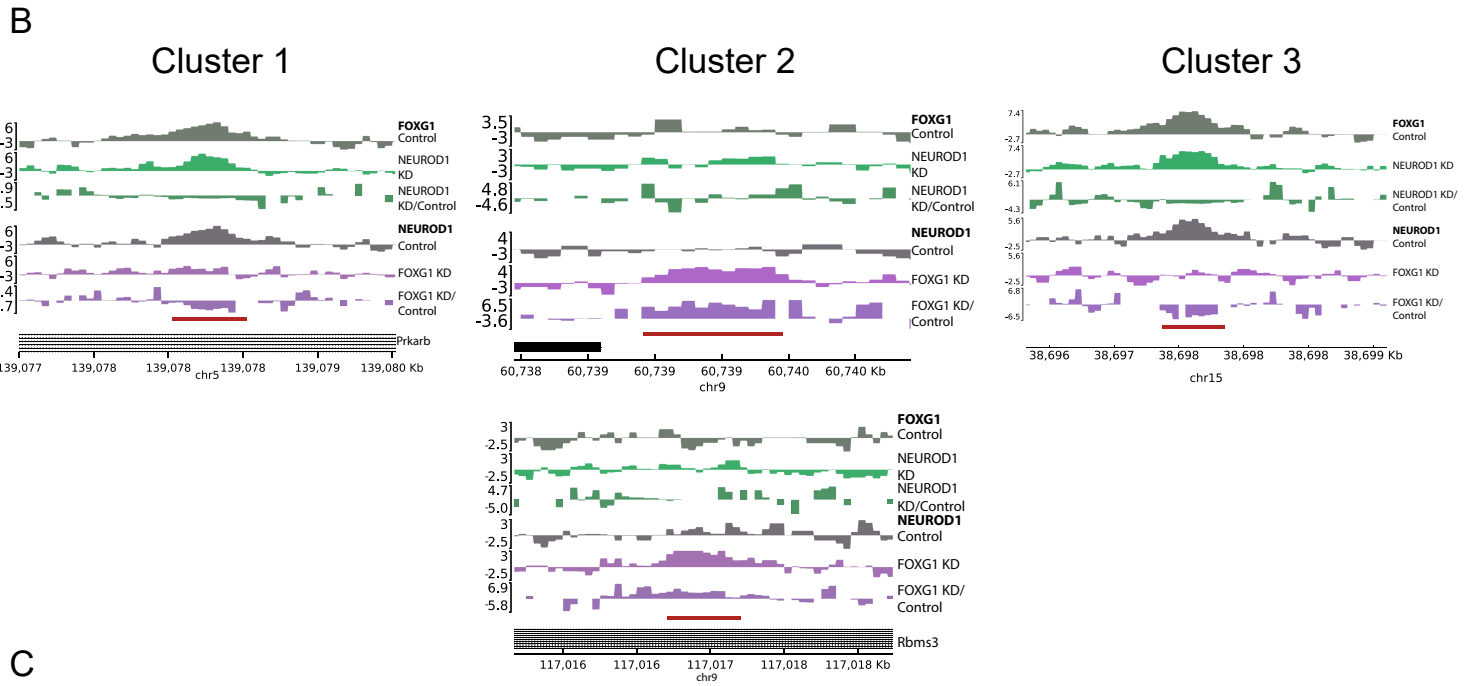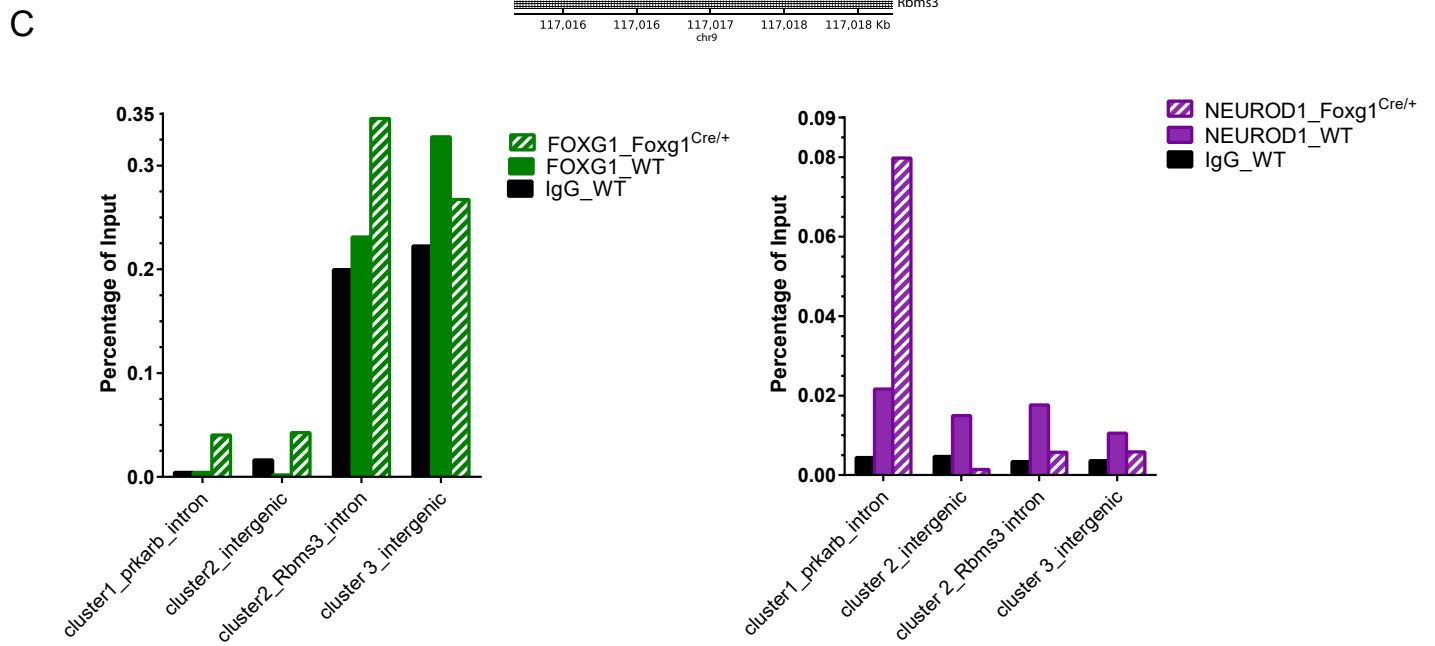

**Figure S12: NEUROD1 and FOXG1 bind the chromatin cooperatively and competitively *in vivo*.**

**(A)** Pipeline explaining target selection and experimental design of FOXG1-NEUROD1 ChIP-qPCR. **(B)** Genome browser tracks of FOXG1 and NEUROD1 peaks at selected target regions for cluster 1 (left), cluster 2 (middle), and cluster 3 (left). Track labels are on the right of plots. Red line depicts the regions targeted in ChIP-qPCR experiments. **(C)** FOXG1 (left) and NEUROD1 (right) ChIP-qPCR analysis of FOXG1 levels (% Input) of adult WT and *Foxg1<sup>cre/+</sup>* hippocampi at the target regions from (B) (n= 1). Data represented as mean of technical replicates.

A

Decreased NEUROD1      Decreased H3K27ac

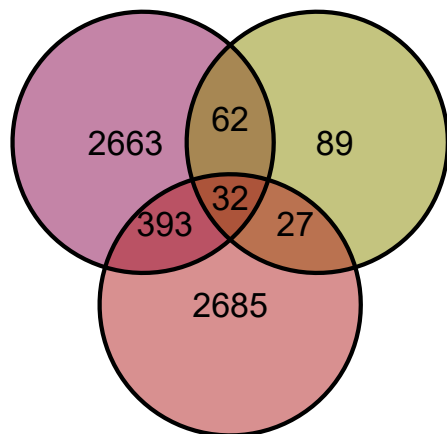

DEGs

B

Increased NEUROD1      Increased H3K27ac

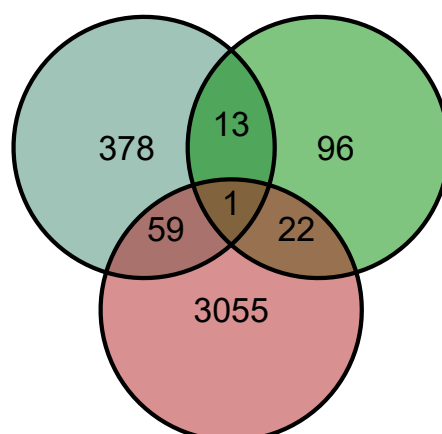

DEGs

**Figure S13: Intersection of differential NEUROD1 and H3K27ac binding, and differential gene expression upon FOXG1 KD.**

**(A)** Venn diagram of decreased NEUROD1 (pink) and H3K27ac (yellow), and differential gene expression (red) upon FOXG1 KD. **(B)** Venn diagram of increased NEUROD1 (turquoise) and H3K27ac (green), and differential gene expression (red) upon FOXG1 KD.

## References to supplementary data

1. S. C. Weise, *et al.*, FOXG1 Regulates PRKAR2B Transcriptionally and Posttranscriptionally via miR200 in the Adult Hippocampus. *Mol Neurobiol* **56**, 5188–5201 (2019).
2. L. Arrigoni, *et al.*, RELACS nuclei barcoding enables high-throughput ChIP-seq. *Commun Biol* **1**, 214 (2018).
3. J. Seoane, H.-V. Le, L. Shen, S. A. Anderson, J. Massagué, Integration of Smad and Forkhead Pathways in the Control of Neuroepithelial and Glioblastoma Cell Proliferation. *Cell* **117**, 211–223 (2004).
4. C. Liu, *et al.*, Dysregulation of PINCH signaling in mesial temporal epilepsy. *J Clin Neurosci* **36**, 43–52 (2017).
5. J. D. Buenrostro, B. Wu, H. Y. Chang, W. J. Greenleaf, ATAC-seq: A Method for Assaying Chromatin Accessibility Genome-Wide. *Curr Protoc Mol Biol* **109**, 21.29.1-21.29.9 (2015).
6. L. Shen, I. S. of M. at M. S. <shenli sam at gmail.com>, *GeneOverlap: Test and visualize gene overlaps* (Bioconductor version: Release (3.13), 2021) <https://doi.org/10.18129/B9.bioc.GeneOverlap> (October 17, 2021).
7. A. R. Quinlan, I. M. Hall, BEDTools: a flexible suite of utilities for comparing genomic features. *Bioinformatics* **26**, 841–842 (2010).
8. E. S. Lein, *et al.*, Genome-wide atlas of gene expression in the adult mouse brain. *Nature* **445**, 168–176 (2007).
9. V. Bhardwaj, *et al.*, snakePipes: facilitating flexible, scalable and integrative epigenomic analysis. *Bioinformatics* **35**, 4757–4759 (2019).
10. F. Ferrari, *et al.*, DOT1L-mediated murine neuronal differentiation associates with H3K79me2 accumulation and preserves SOX2-enhancer accessibility. *Nat Commun* **11**, 5200 (2020).
11. M. I. Love, W. Huber, S. Anders, Moderated estimation of fold change and dispersion for RNA-seq data with DESeq2. *Genome Biology* **15**, 550 (2014).
12. Y. Liao, G. K. Smyth, W. Shi, featureCounts: an efficient general purpose program for assigning sequence reads to genomic features. *Bioinformatics* **30**, 923–930 (2014).
13. F. Ramírez, *et al.*, deepTools2: a next generation web server for deep-sequencing data analysis. *Nucleic Acids Res* **44**, W160-165 (2016).
14. A. T. L. Lun, G. K. Smyth, De novo detection of differentially bound regions for ChIP-seq data using peaks and windows: controlling error rates correctly. *Nucleic Acids Res* **42**, e95 (2014).
15. E. Afgan, *et al.*, The Galaxy platform for accessible, reproducible and collaborative biomedical analyses: 2016 update. *Nucleic Acids Res* **44**, W3–W10 (2016).
16. R. Stark, G. Brown, *DiffBind: Differential Binding Analysis of ChIP-Seq Peak Data* (Bioconductor version: Release (3.13), 2021) <https://doi.org/10.18129/B9.bioc.DiffBind> (October 17, 2021).



17. G. Yu, L.-G. Wang, Q.-Y. He, CHIPseeker: an R/Bioconductor package for ChIP peak annotation, comparison and visualization. *Bioinformatics* **31**, 2382–2383 (2015).
18. A. Khan, A. Mathelier, Intervene: a tool for intersection and visualization of multiple gene or genomic region sets. *BMC Bioinformatics* **18**, 287 (2017).
19. S. J. van Heeringen, G. J. C. Veenstra, GimmeMotifs: a de novo motif prediction pipeline for ChIP-sequencing experiments. *Bioinformatics* **27**, 270–271 (2011).
20. T. Wu, *et al.*, clusterProfiler 4.0: A universal enrichment tool for interpreting omics data. *The Innovation* **2**, 100141 (2021).
21. CRAN. R Kolde, pheatmap: Pretty Heatmaps. R package version 1.0. 12 (2019).
22. B. K. Lewis M Rana S., EnhancedVolcano: Publication-ready volcano plots with enhanced colouring and labeling. R package version 1.14.0, (2022).
23. , ggplot2 | SpringerLink (June 30, 2022).
24. Linlin Yan (2021)., ggvenn: Draw Venn Diagram by “ggplot2”. R package version 0.1.9.
25. Hanbo Chen, VennDiagram: Generate High-Resolution Venn and Euler Plots. R package version 1.7.3. (2022).
26. M. S. Cembrowski, L. Wang, K. Sugino, B. C. Shields, N. Spruston, Hipposeq: a comprehensive RNA-seq database of gene expression in hippocampal principal neurons. *eLife* **5**, e14997 (2016).
27. D. Szklarczyk, *et al.*, The STRING database in 2021: customizable protein-protein networks, and functional characterization of user-uploaded gene/measurement sets. *Nucleic Acids Res* **49**, D605–D612 (2021).
